# Supplementary material for: Transition metal-free, photocatalytic arylation and dioxygenation for vicinal diketone synthesis using alkynes and arene diazonium salts
Source: Royal Society of Chemistry journal article supplement (doi:10.1039/d3qo00064h), 2023-01-01
Supplement: d3qo00064h1.pdf [file d3qo00064h1.pdf]

# Transition metal-free, photocatalytic arylation and deoxygenation for vicinal diketone synthesis using alkynes and arene diazonium salts

Baoli Zhao,<sup>a,b</sup> Xiaoting Yin,<sup>b</sup> Haifeng Li,<sup>b</sup> Kai Cheng<sup>b,\*</sup> and Jie-Ping Wan<sup>a,\*</sup>

<sup>a</sup> College of Chemistry and Chemical Engineering, Jiangxi Normal University,  
Nanchang 330022, China. Email: wanjieping@jxnu.edu.cn

<sup>b</sup> Zhejiang Key Laboratory of Alternative Technologies for Fine Chemicals Process,  
Shaoxing University, Shaoxing, 312000, China. Email: chengkai@usx.edu.cn

## Content

|                                                                                                               |    |
|---------------------------------------------------------------------------------------------------------------|----|
| General .....                                                                                                 | 2  |
| Preparation of Arenediazonium Salts.....                                                                      | 2  |
| Typical procedure for the products.....                                                                       | 2  |
| Typical Procedure for products 3a on gram-scale.....                                                          | 3  |
| General experimental procedure for the synthesis of desired product via the<br>one-pot, two-step process..... | 3  |
| Characterization data of the product.....                                                                     | 4  |
| References.....                                                                                               | 31 |

## General

Reagents and solvents were used as it is obtained from commercial vendors. Products were purified by column chromatography on silica gel (300–400 mesh).  $^1\text{H}$  and  $^{13}\text{C}$  NMR spectra were obtained on Bruker–400 (500) MHz spectrometers using tetramethylsilane as internal standard in  $\text{CDCl}_3$ . Chemical shifts of  $^1\text{H}$  NMR and  $^{13}\text{C}$  NMR are reported as  $\delta$  values relative to TMS and  $\text{CDCl}_3$  respectively. Chemical shifts were reported in parts per million (ppm,  $\delta$ ). Proton coupling patterns are described as singlet (s), doublet (d), triplet (t), quartet (q), multiplet (m), and broad resonances (br). GC-MS data were collected on Gas Chromatography-mass spectrometer.

## Preparation of Arenediazonium Salts

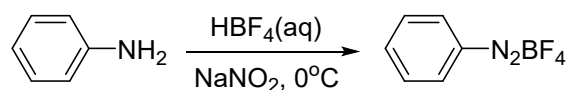

To a suspension of aryl amine (10.0 mmol) in water at room temperature was added  $\text{HBF}_4$  (48% in water, 20.0 mmol, 2.0 equiv) and the reaction mixture was stirred for 2 min. The mixture was cooled to  $0^\circ\text{C}$  and a solution of  $\text{NaNO}_2$  (10.0 mmol, 1.0 equiv) in water (8.3 M) was added drop-wise. After addition the reaction mixture was stirred at  $0^\circ\text{C}$  for 15 min. The solids were filtered, washed with ice-cold water (5 mL) and diethyl ether (10 mL) to give the crude product. This was purified by precipitation with diethyl ether from an acetone solution to obtain arenediazonium salt (**1a**) as

solid.

### **Typical procedure for the product**

To a 25 mL-schlenk tube charged with a stirring bar, was added arenediazonium tetrafluoroborates (0.5 mmol), aryl acetylenes (0.5 mmol), Eosin Y (2 mol %), 4 Å molecular sieves (40 mg, 2 wt%) and anhydrous MeCN (1.5 mL)/DMSO (0.5 mL) under oxygen (1 atm) with light irradiation using 3 W blue LED for 12 h. The reaction mixture was then diluted with water, extracted with Et<sub>2</sub>O (2 mL×3). The organic layers were dried over Na<sub>2</sub>SO<sub>4</sub>, then the organic solvent was removed under reduced pressure. The residues were purified by flash column chromatography on silica with an appropriate solvent to afford the pure product.

### **Typical Procedure for products 3a on gram-scale**

To a 100 mL-schlenk tube charged with a stirring bar, was added phenyldiazonium tetrafluoroborates (5 mmol), aryl acetylenes (5 mmol), Eosin Y (2 mol %), 4 Å molecular sieves (400 mg, 2 wt%) and anhydrous MeCN (15 mL)/DMSO (5 mL) under oxygen (1 atm) with light irradiation using 3 W blue LED for 12 h. The reaction mixture was then diluted with water, extracted with Et<sub>2</sub>O (2 mL×3). The organic layers were dried over Na<sub>2</sub>SO<sub>4</sub>, then the organic solvent was removed under reduced pressure. The residues were purified by flash column chromatography on silica with an appropriate solvent to afford the desired benzil product.

### **General experimental procedure for the synthesis of desired product via the one-**

### pot, two-step process

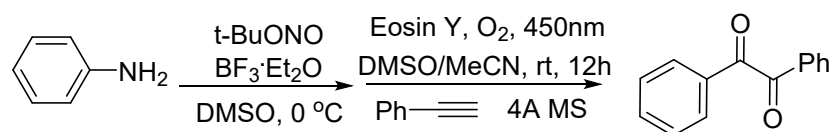

*t*-BuONO (0.8 mmol) was added dropwisely to a solution of aniline (0.5 mmol) and BF<sub>3</sub>·Et<sub>2</sub>O (0.8 mmol) in DMSO (1 mL) under 0 °C. After 10 minutes, the above mixture was added to a solution of phenyl acetylene (0.5 mmol), 4 Å molecular sieves (40 mg, 12 wt %) and eosin Y (0.01 mmol) in MeCN (3 mL) under oxygen protection via a syringe. The reaction was stirred at room temperature under light irradiation using 3 W blue LED for about 12 hours. After completion of reaction as indicated by TLC, the reaction mixture was then diluted with water, extracted with Et<sub>2</sub>O (3 mL×3). The organic layers were dried over Na<sub>2</sub>SO<sub>4</sub>, then the organic solvent was removed under reduced pressure. The residues were purified by flash column chromatography on silica with an appropriate solvent to give the desired benzil product.

### Characterization data of the product

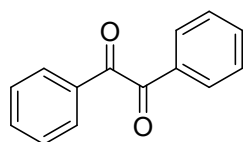

**Benzil (3a).** 79 mg, 75% yield; white solid after purification by column chromatography (eluent, ethyl acetate/petroleum ether = 1:30, v/v); mp 93 – 95 °C (lit.<sup>1</sup> 95 – 97 °C); <sup>1</sup>H NMR (400 MHz, CDCl<sub>3</sub>, TMS) δ 7.98 (d, *J* = 8.4 Hz, 4H), 7.67 (t, *J* = 7.6 Hz, 2H), 7.51 (t, *J* = 7.6 Hz, 4H); <sup>13</sup>C NMR (100 MHz, CDCl<sub>3</sub>) δ 194.6, 134.9, 133.0, 129.9, 129.0. GC-MS (EI): *m/z*=210.09(M<sup>+</sup>).

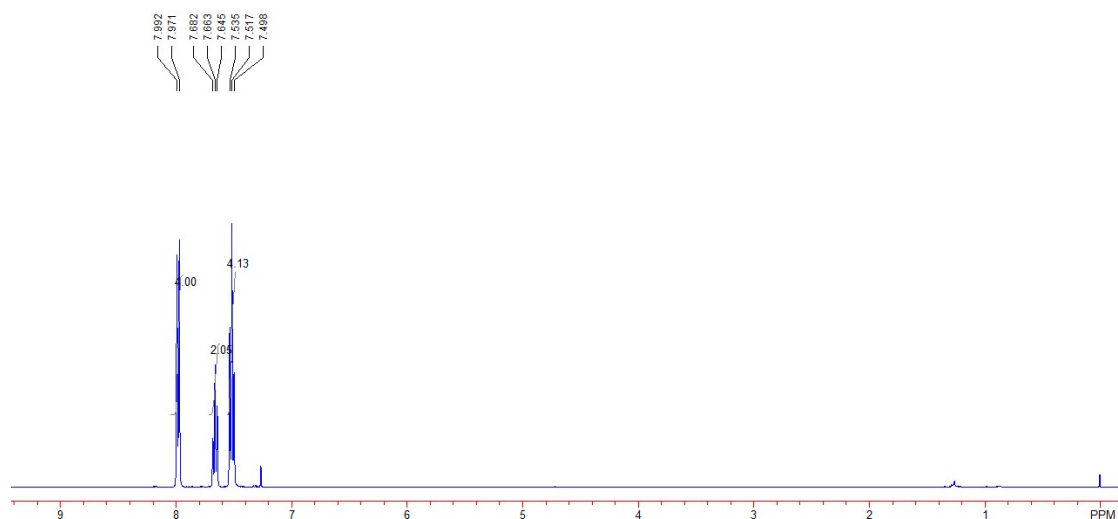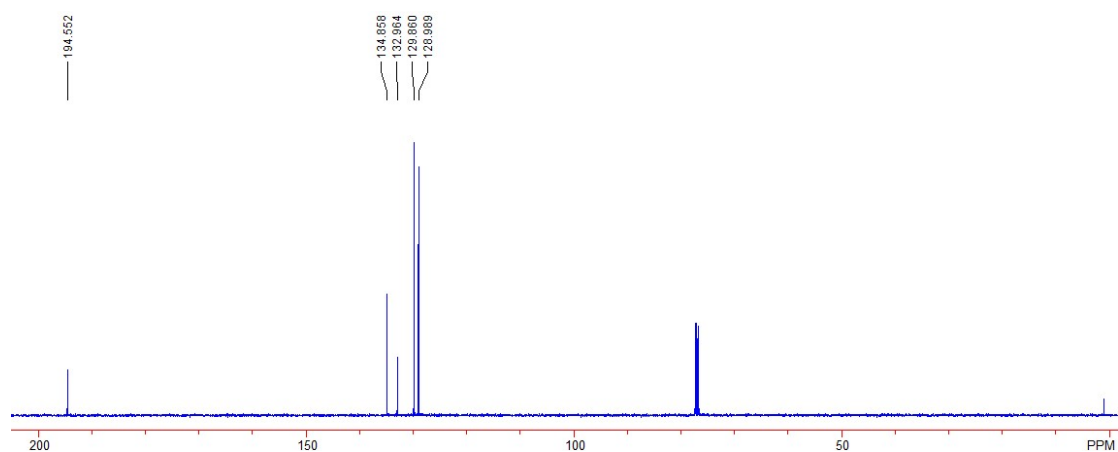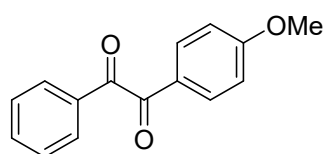

**1-(4-Methoxyphenyl)-2-phenylethane-1,2-dione (3b).** 82 mg, 68% yield; light yellow solid after purification by column chromatography (eluent, ethyl acetate/petroleum ether = 1:30, v/v); mp 62 – 63 °C (lit.<sup>2</sup> 63 – 64 °C); <sup>1</sup>H NMR (400 MHz, CDCl<sub>3</sub>, TMS) δ 7.94 (t, *J* = 8.8 Hz, 4H), 7.63 (d, *J* = 7.6 Hz, 1H), 7.49 (t, *J* = 7.6 Hz, 2H), 6.96 (d, *J* = 8.8 Hz, 2H), 3.86 (s, 3H); <sup>13</sup>C NMR (100 MHz, CDCl<sub>3</sub>) δ 194.9, 193.2, 165.0, 134.7, 133.1, 132.4, 129.9, 129.0, 126.0, 114.4, 55.6. GC-MS (EI): *m/z*=240.09(M<sup>+</sup>).

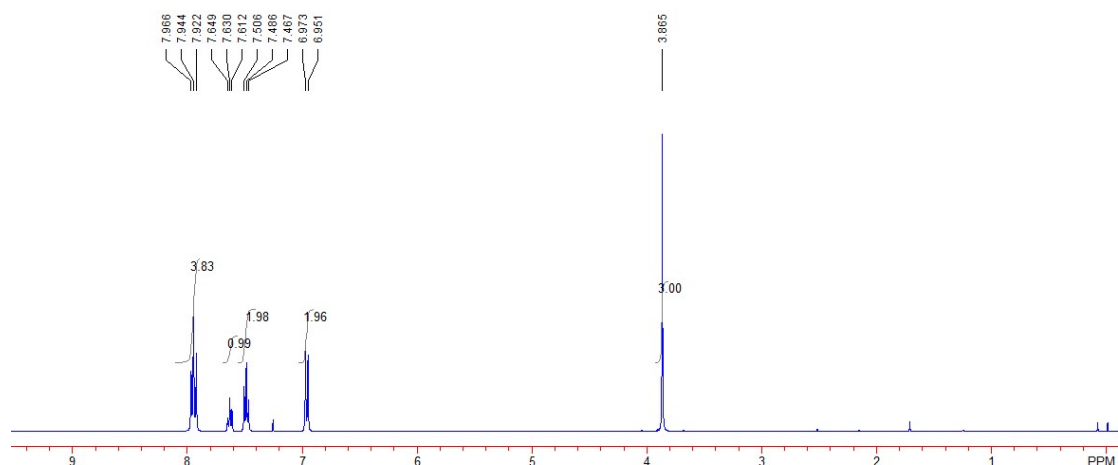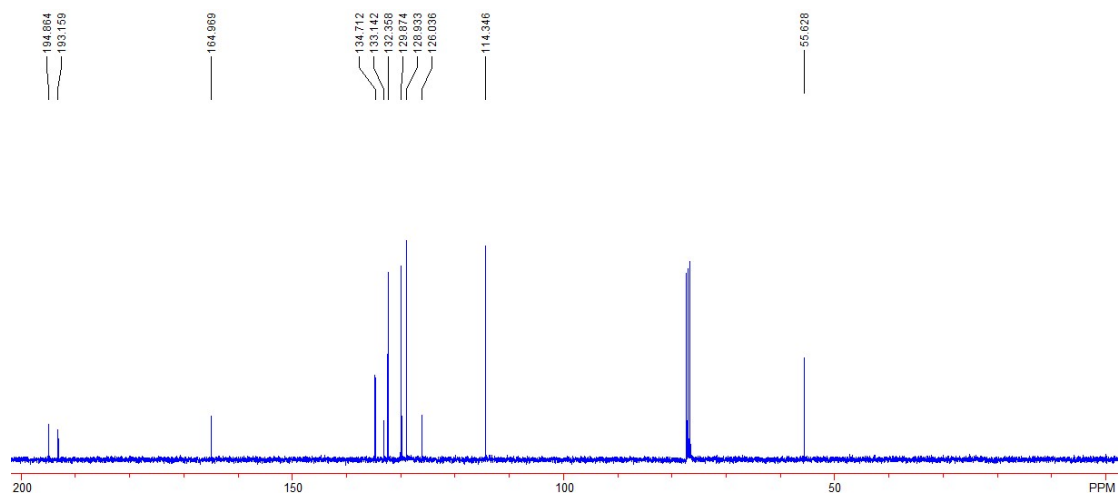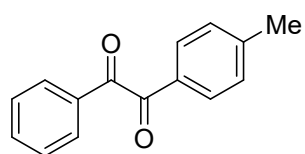

**1-Phenyl-2-p-tolyethane-1,2-dione (3c).** 82 mg, 73% yield; light yellow solid after purification by column chromatography (eluent, ethyl acetate/petroleum ether = 1:30, v/v); mp 32 – 33 °C (lit.<sup>1</sup> 30 – 31 °C); <sup>1</sup>H NMR (400 MHz, CDCl<sub>3</sub>, TMS) δ 7.96 (d, *J* = 8.0 Hz, 2H), 7.86 (d, *J* = 7.6 Hz, 2H), 7.63 (t, *J* = 7.2 Hz, 1H), 7.49 (t, *J* = 7.6 Hz, 2H), 7.30 (d, *J* = 8.4 Hz, 2H), 2.42 (s, 3H); <sup>13</sup>C NMR (100 MHz, CDCl<sub>3</sub>) δ 194.7, 194.3, 146.2, 134.8, 133.0, 130.6, 130.0, 129.8, 129.7, 128.9, 21.9; GC-MS (EI): *m/z*=224.07(M<sup>+</sup>).

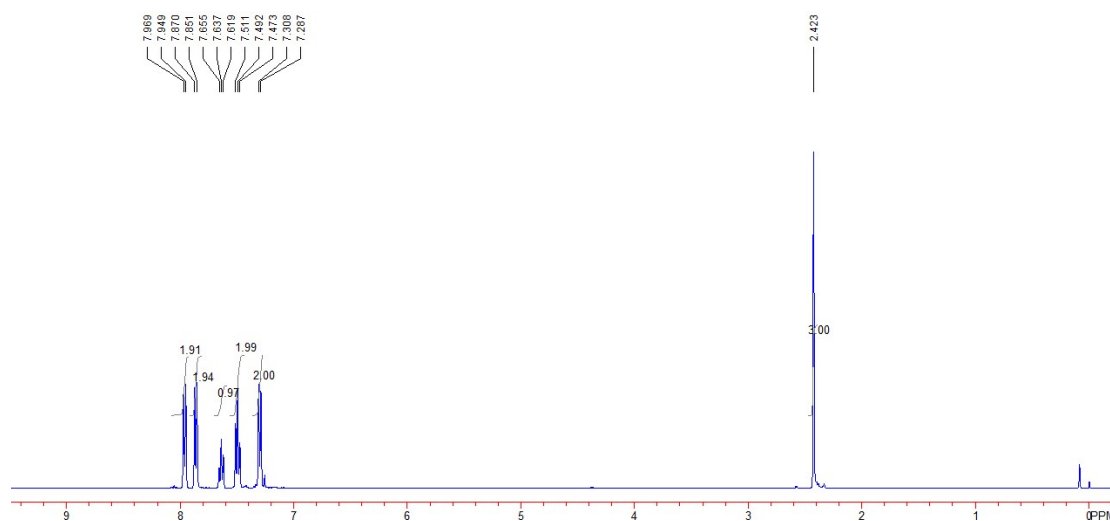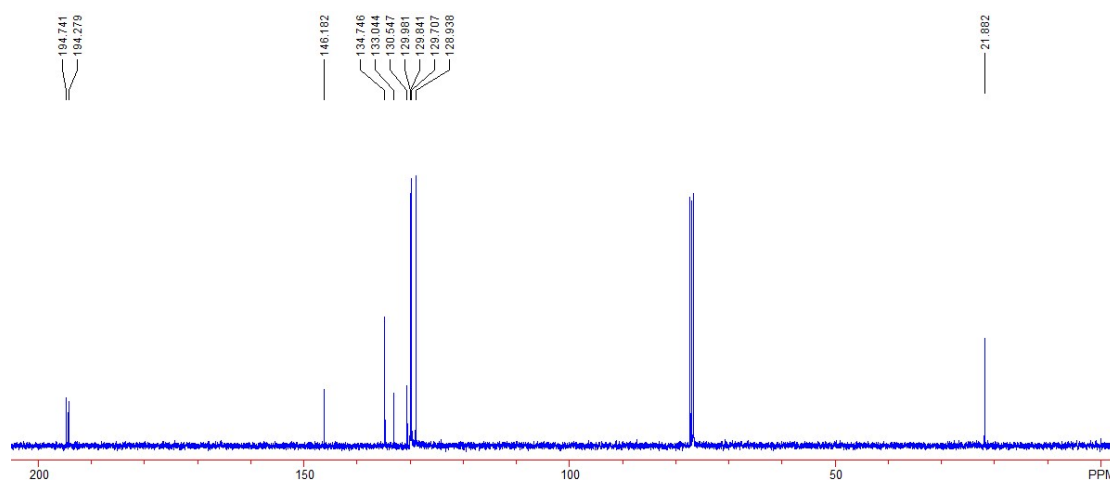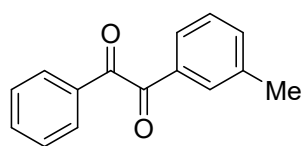

**1-Phenyl-2-m-tolyethane-1,2-dione (3d).** 77 mg, 69% yield; light yellow solid after purification by column chromatography (eluent, ethyl acetate/petroleum ether = 1:30, v/v); mp 57 – 59 °C (lit.<sup>3</sup> 56 – 57 °C); <sup>1</sup>H NMR (400 MHz, CDCl<sub>3</sub>, TMS) δ 8.00 (d, *J* = 8.0 Hz, 2H), 7.79 (d, *J* = 11.2 Hz, 2H), 7.67 (t, *J* = 6.8 Hz, 1H), 7.47 – 7.55 (m, 3 H), 7.41 (t, *J* = 7.6 Hz, 1H), 2.42 (s, 3 H); <sup>13</sup>C NMR (100 MHz, CDCl<sub>3</sub>) δ 194.8, 194.7, 139.0, 135.7, 134.8, 133.0, 133.0, 130.2, 129.9, 129.0, 128.9,

127.2, 21.2; GC-MS (EI):  $m/z=224.08(M^+)$ .

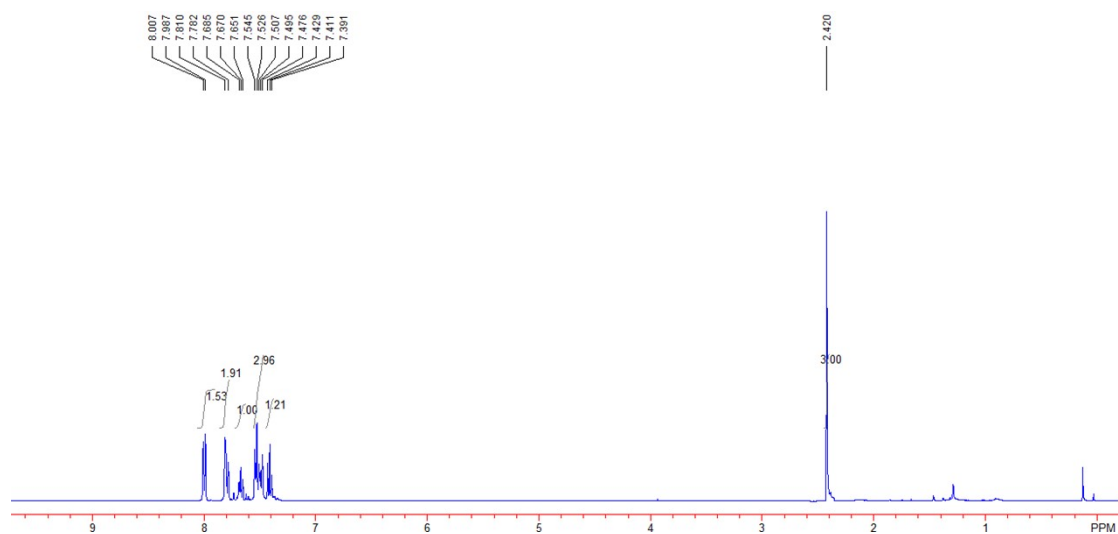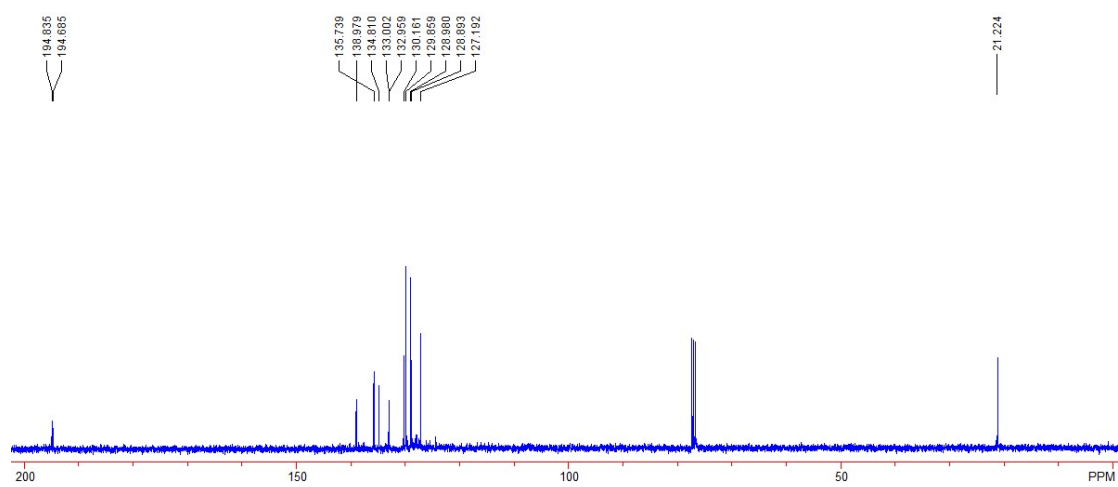

**(4) 1-Phenyl-2-o-tolyethane-1,2-dione (2e)**

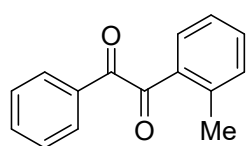



**1-Phenyl-2-o-tolyethane-1,2-dione (3d).** 62 mg, 55% yield; light yellow solid after purification by column chromatography (eluent, ethyl acetate/petroleum ether = 1:10, v/v); mp 55 – 56 °C (lit.<sup>3</sup> 56 – 57 °C); <sup>1</sup>H NMR (400 MHz, CDCl<sub>3</sub>, TMS) δ 7.99 (d, *J* = 8.0 Hz, 2H), 7.65 (d, *J* = 7.2 Hz, 2H), 7.48 – 7.55 (m, 3H), 7.36 (d, *J* = 7.2 Hz, 1H), 7.27 (t, *J* = 7.6 Hz, 1H), 2.73 (s, 3H); <sup>13</sup>C NMR (100 MHz, CDCl<sub>3</sub>) δ 196.8, 194.9, 141.4, 134.7, 133.8, 133.1, 133.1, 132.6, 131.7, 129.9, 129.0, 126.0, 21.9; GC-MS (EI): *m/z*=224.09(M<sup>+</sup>).

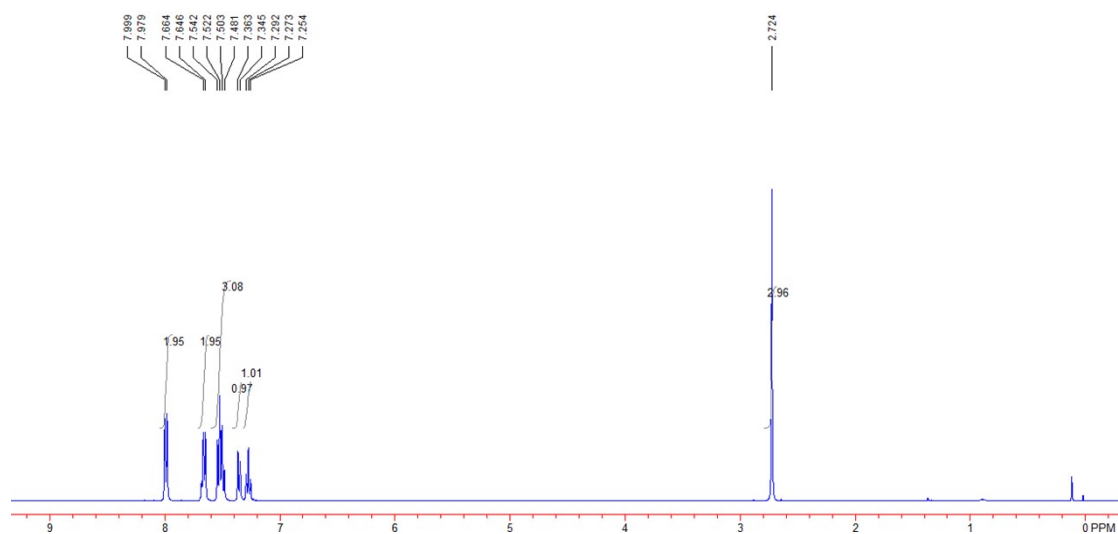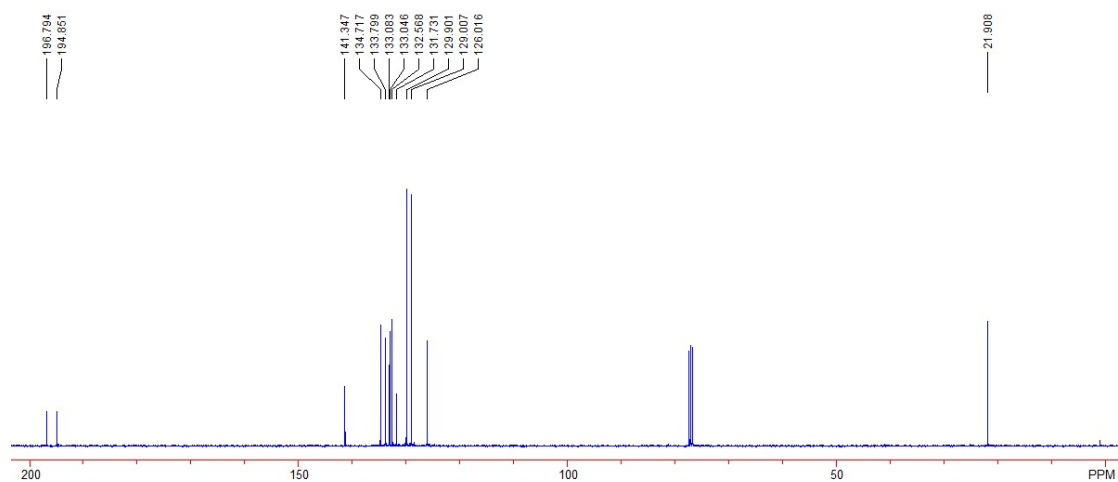

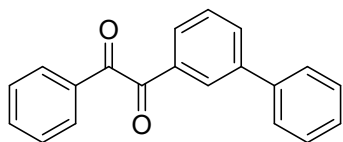

**1-Phenyl-2-m-phenylethane-1,2-dione (3f).** 99 mg, 69% yield; white solid after purification by column chromatography (eluent, ethyl acetate/petroleum ether = 1:20, v/v); mp 89 – 91 °C;  $^1\text{H NMR}$  (400 MHz,  $\text{CDCl}_3$ , TMS)  $\delta$  8.29 (s, 1H), 8.16 (d,  $J = 8.0$  Hz, 1H), 8.00 (t,  $J = 7.2$  Hz, 4H), 7.93 (d,  $J = 7.6$  Hz, 1H), 7.65 – 7.73 (m, 3H), 7.50 – 7.57 (m, 4H);  $^{13}\text{C NMR}$  (100 MHz,  $\text{CDCl}_3$ )  $\delta$  194.5, 193.3, 135.2, 134.9, 133.5, 133.1, 133.0, 132.6, 131.6, 131.1, 130.0, 129.9, 129.7, 129.1, 129.0, 126.4; GC-MS (EI):  $m/z=286.11(\text{M}^+)$ .

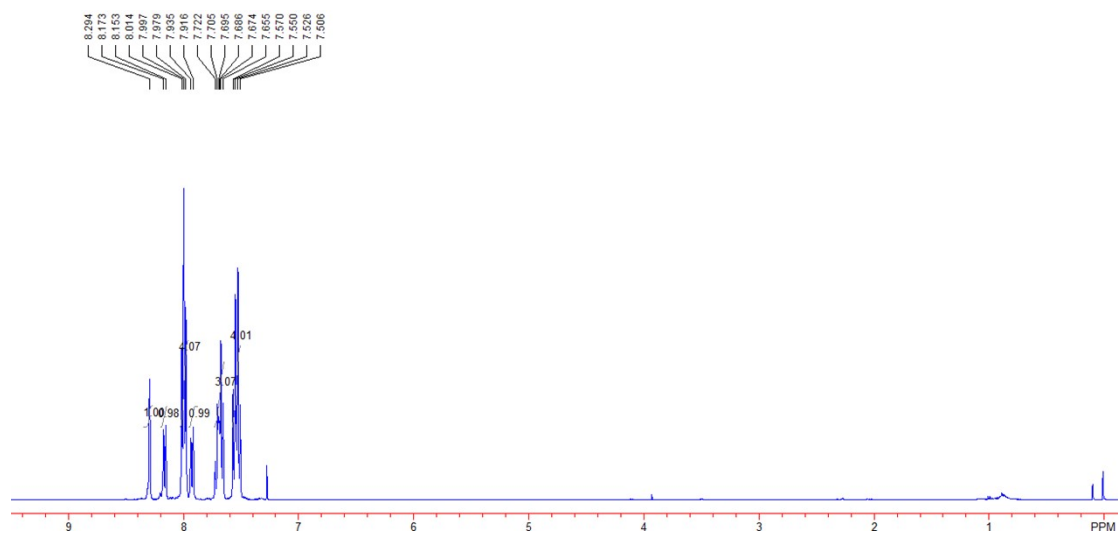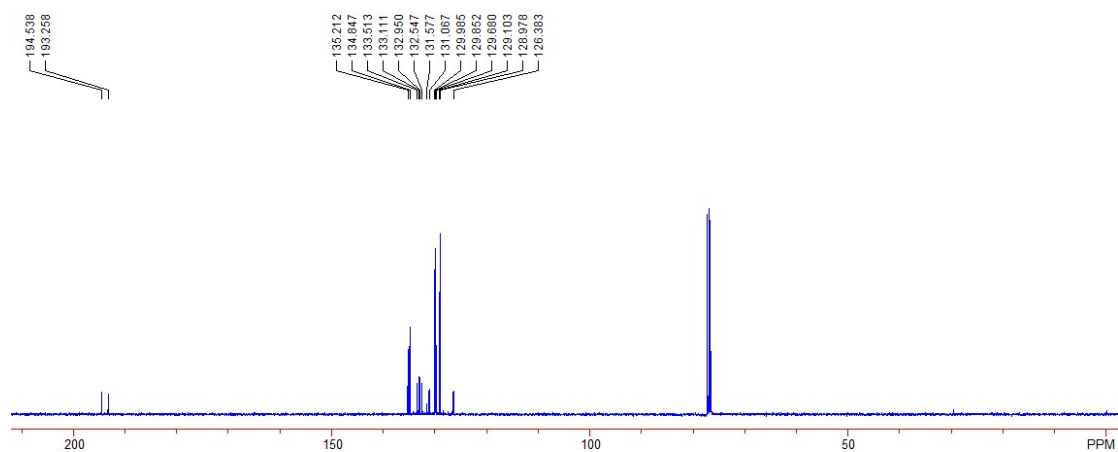

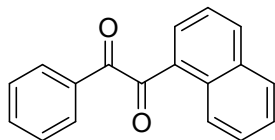

**1-(Naphthalen-1-yl)-2-phenylethane-1,2-dione (3g).** 68 mg, 52% yield; white solid after purification by column chromatography (eluent, ethyl acetate/petroleum ether = 1:20, v/v); mp 99 – 101 °C (lit.<sup>4</sup> 98 – 99 °C); <sup>1</sup>H NMR (400 MHz, CDCl<sub>3</sub>, TMS) δ 9.39 (d, *J* = 8.4 Hz, 1H), 8.14 (d, *J* = 8.0 Hz, 1H), 8.09 (d, *J* = 6.8 Hz, 2H), 7.96 (d, *J* = 7.2 Hz, 2H), 7.78 (t, *J* = 7.2 Hz, 1H), 7.64 – 7.71 (m, 2H), 7.48 – 7.57 (m, 3H); <sup>13</sup>C NMR (100 MHz, CDCl<sub>3</sub>) δ 197.2, 194.6, 136.0, 135.1, 134.8, 134.1, 133.3, 130.9, 130.0, 129.4, 129.0, 128.8, 128.5, 127.1, 125.9, 124.4; GC-MS (EI): *m/z*=260.07(M<sup>+</sup>).

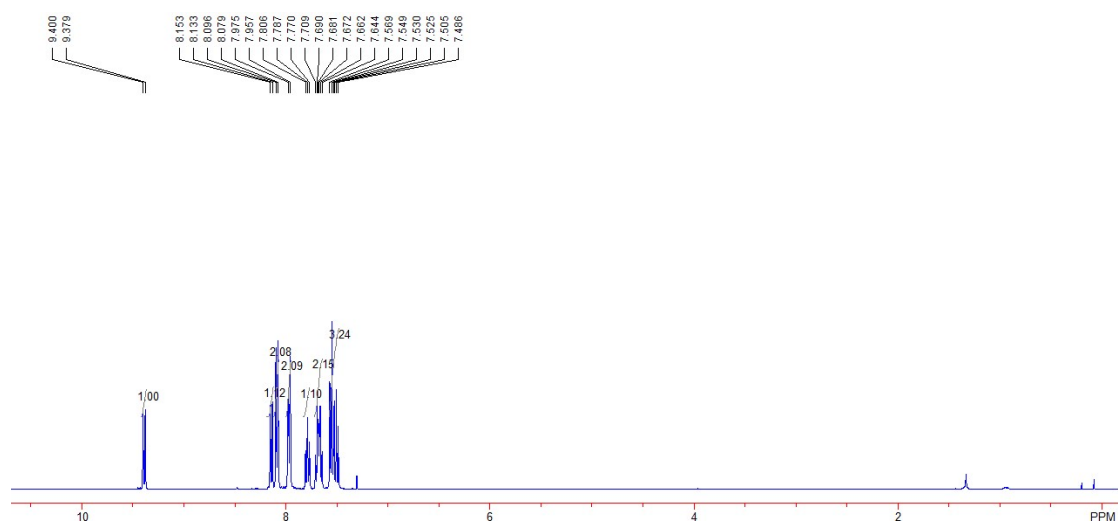

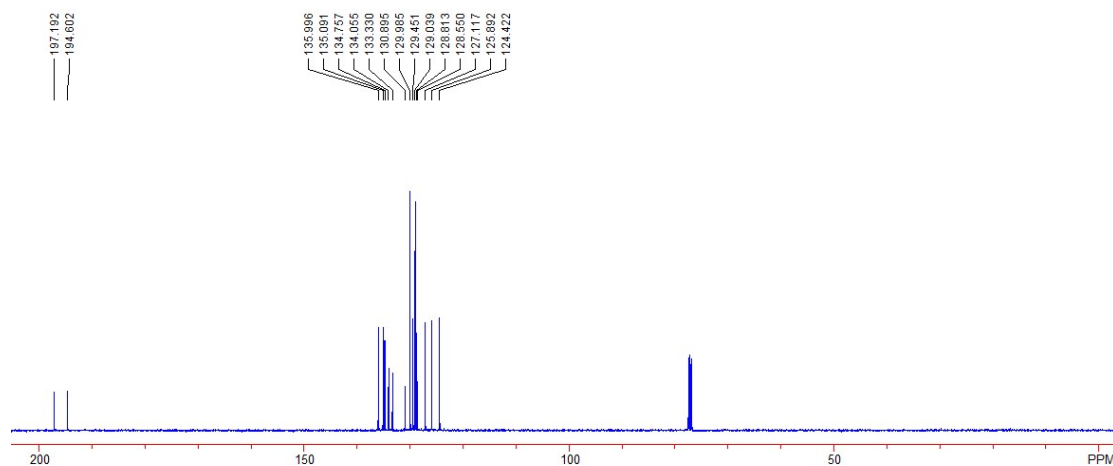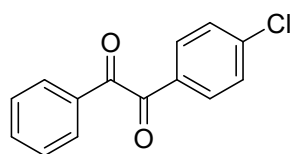

**1-(4-Chlorophenyl)-2-phenylethane-1,2-dione (3h).** 76 mg, 62% yield; light yellow solid after purification by column chromatography (eluent, ethyl acetate/petroleum ether = 1:30, v/v); mp 71 – 73 °C (lit.<sup>1</sup> 73 – 74 °C); <sup>1</sup>H NMR (400 MHz, CDCl<sub>3</sub>, TMS) δ 8.01 (d, *J* = 7.6 Hz, 2H), 7.96 (d, *J* = 8.8 Hz, 2H), 7.71 (t, *J* = 7.2 Hz, 1H), 7.51 – 7.58 (m, 4H); <sup>13</sup>C NMR (100 MHz, CDCl<sub>3</sub>) δ 193.9, 193.0, 141.6, 135.0, 132.7, 131.3, 131.2, 129.9, 129.4, 129.0; GC-MS (EI): *m/z*=244.02(M<sup>+</sup>).

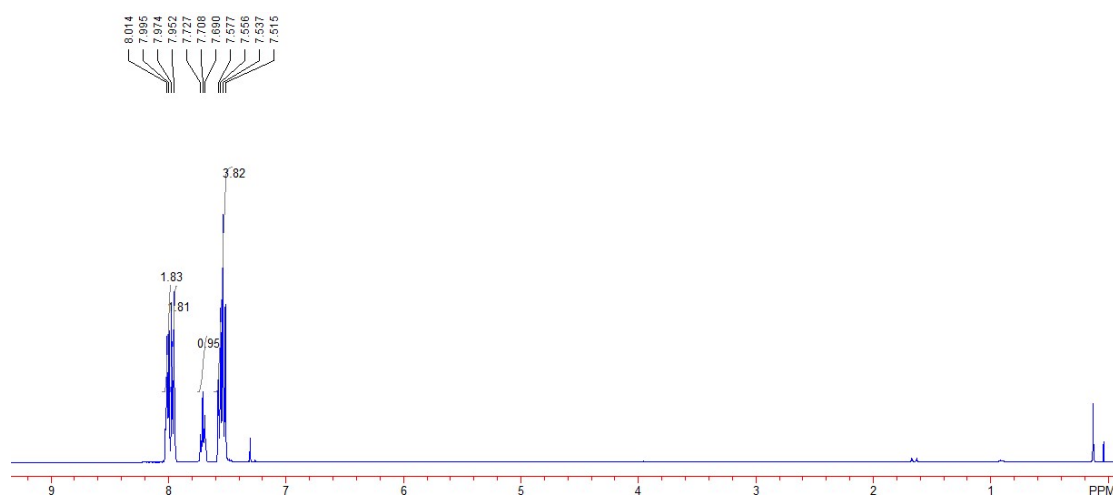

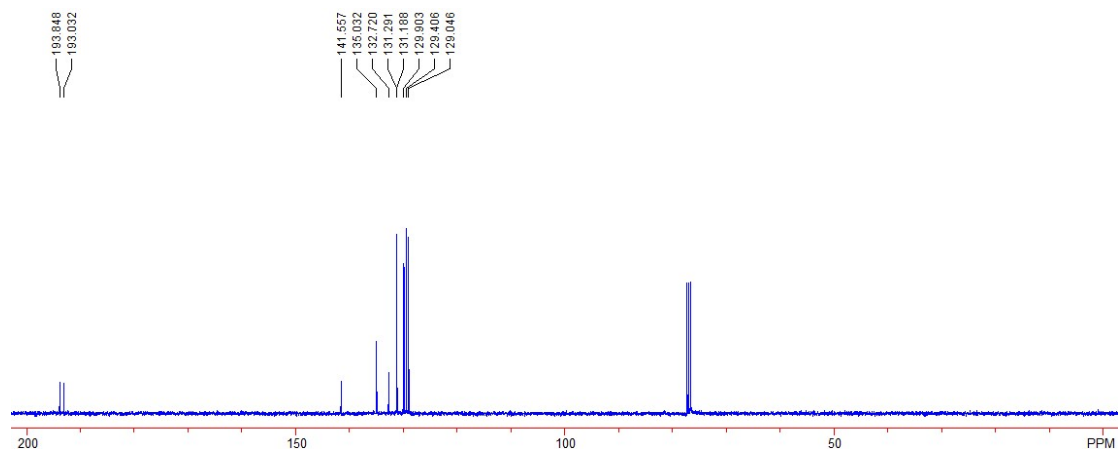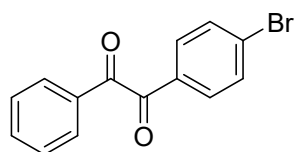

**1-(4-Bromophenyl)-2-phenylethane-1,2-dione (3i).** 94 mg, 65% yield; yellow solid after purification by column chromatography (eluent, ethyl acetate/petroleum ether = 1:30, v/v); mp 88 – 90 °C (lit.<sup>3</sup> 86 – 87 °C); <sup>1</sup>H NMR (400 MHz, CDCl<sub>3</sub>, TMS) δ 7.96 (d, *J* = 8.4 Hz, 2H), 7.84 (d, *J* = 8.0 Hz, 2H), 7.66 (d, *J* = 8.4 Hz, 3H), 7.52 (t, *J* = 7.6 Hz, 2H); <sup>13</sup>C NMR (100 MHz, CDCl<sub>3</sub>) δ 193.8, 193.2, 135.0, 132.7, 132.4, 131.7, 131.2, 130.5, 129.9, 129.0; GC-MS (EI): *m/z*=288.00(M<sup>+</sup>).

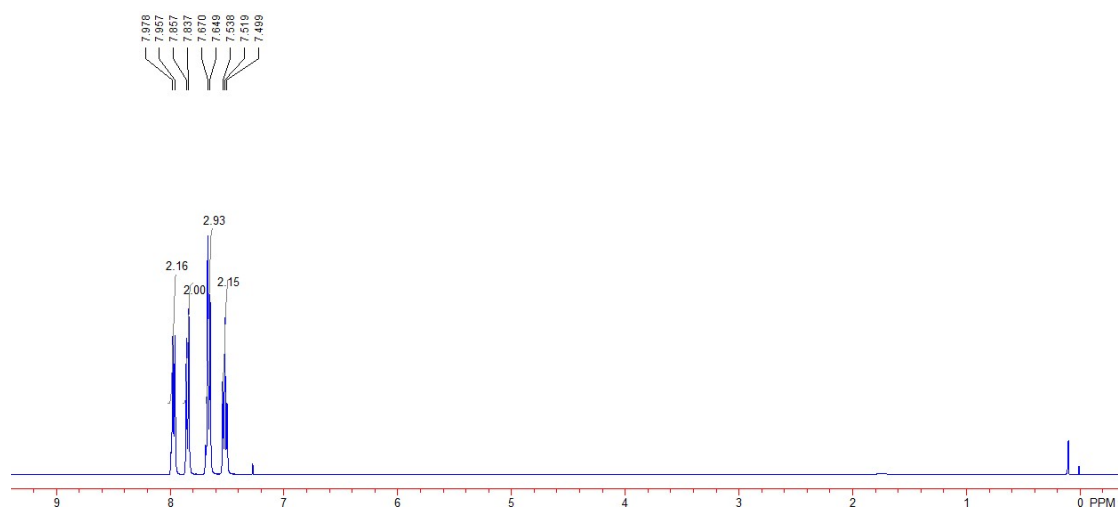

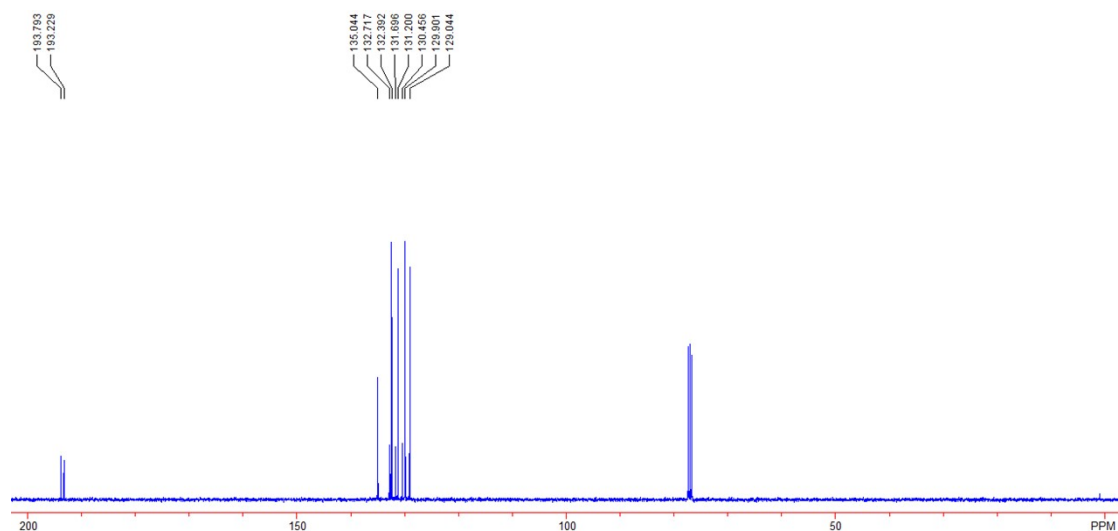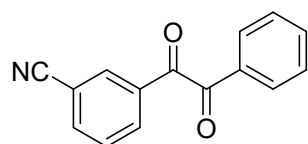

**3-(2-Oxo-2-phenylacetyl)benzonitrile (3j).** 68 mg, 58% yield; light yellow solid after purification by column chromatography (eluent, ethyl acetate/petroleum ether = 1:20, v/v); mp 95 – 97 °C;  $^1\text{H}$  NMR (400 MHz,  $\text{CDCl}_3$ )  $\delta$  8.30 (d,  $J$  = 1.2 Hz, 1H), 8.26-8.23 (m, 1H), 8.02-8.00 (m, 2H), 7.97-7.94 (m, 1H), 7.75 – 7.68 (m, 2H), 7.58 (t,  $J$  = 8.0 Hz, 2H);  $^{13}\text{C}$  NMR (100 MHz,  $\text{CDCl}_3$ )  $\delta$  192.9, 191.7, 137.4, 135.5, 133.8, 133.7, 133.5, 132.4, 130.1, 129.2, 113.7; GC-MS (EI):  $m/z$ =235.05( $\text{M}^+$ ).

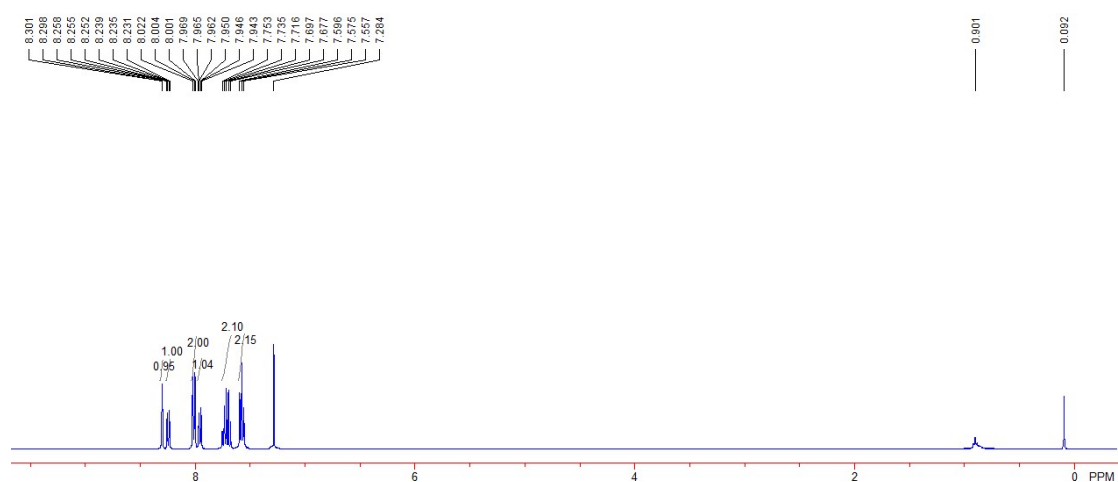

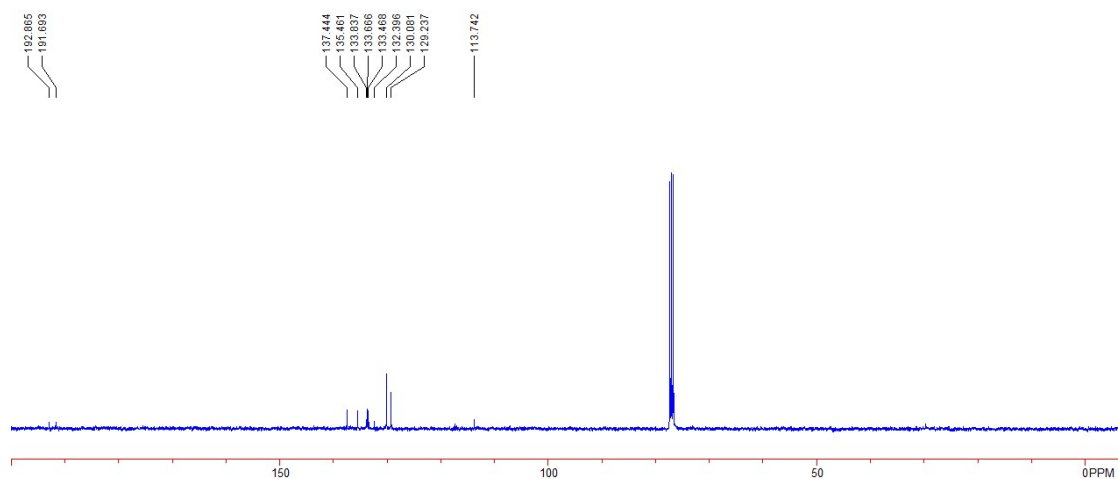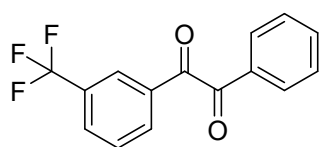

**1-Phenyl-2-(3-(trifluoromethyl)phenyl)ethane-1,2-dione (3k).** 85 mg, 61% yield; light yellow solid after purification by column chromatography (eluent, ethyl acetate/petroleum ether = 1:30, v/v); mp 68–70 °C (lit.<sup>3</sup> 69–70 °C); <sup>1</sup>H NMR (400 MHz, CDCl<sub>3</sub>) δ 8.30 (s, 1H), 8.18 (d, *J* = 8.0 Hz, 1H), 8.02 (d, *J* = 7.9 Hz, 2H), 7.94 (d, *J* = 8.0 Hz, 1H), 7.74–7.67 (m, 2H), 7.57 (t, *J* = 8.0 Hz, 2H); <sup>13</sup>C NMR (100 MHz, CDCl<sub>3</sub>) δ 193.3, 192.6, 135.3, 133.6, 133.2, 132.6, 132.2 (*J* = 124.8 Hz), 131.1 (*J* = 10.0 Hz), 130.0, 129.7, 129.1, 126.4 (*J* = 12.4 Hz). <sup>19</sup>F NMR (250 MHz, CDCl<sub>3</sub>) δ –62.94; GC-MS (EI): *m/z* = 278.07 (*M*<sup>+</sup>).

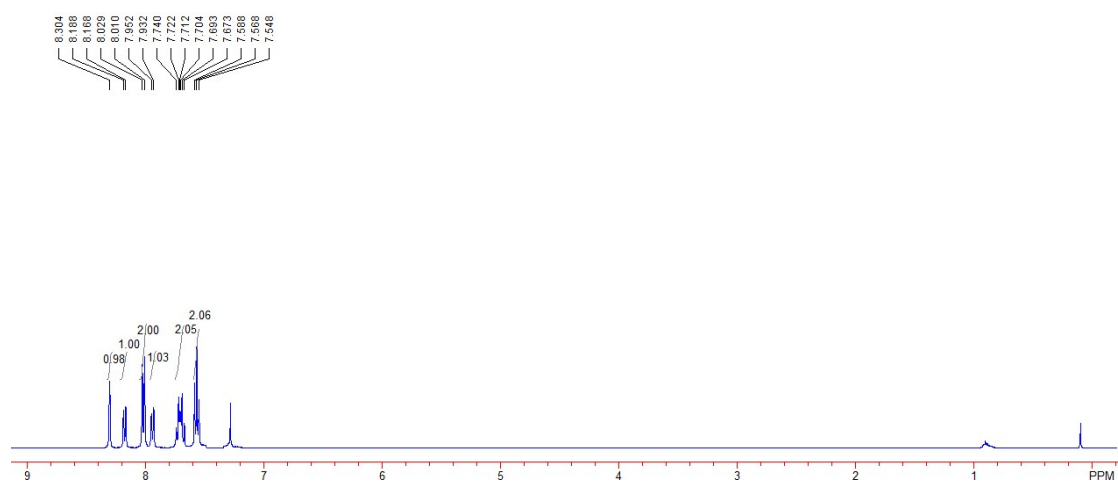

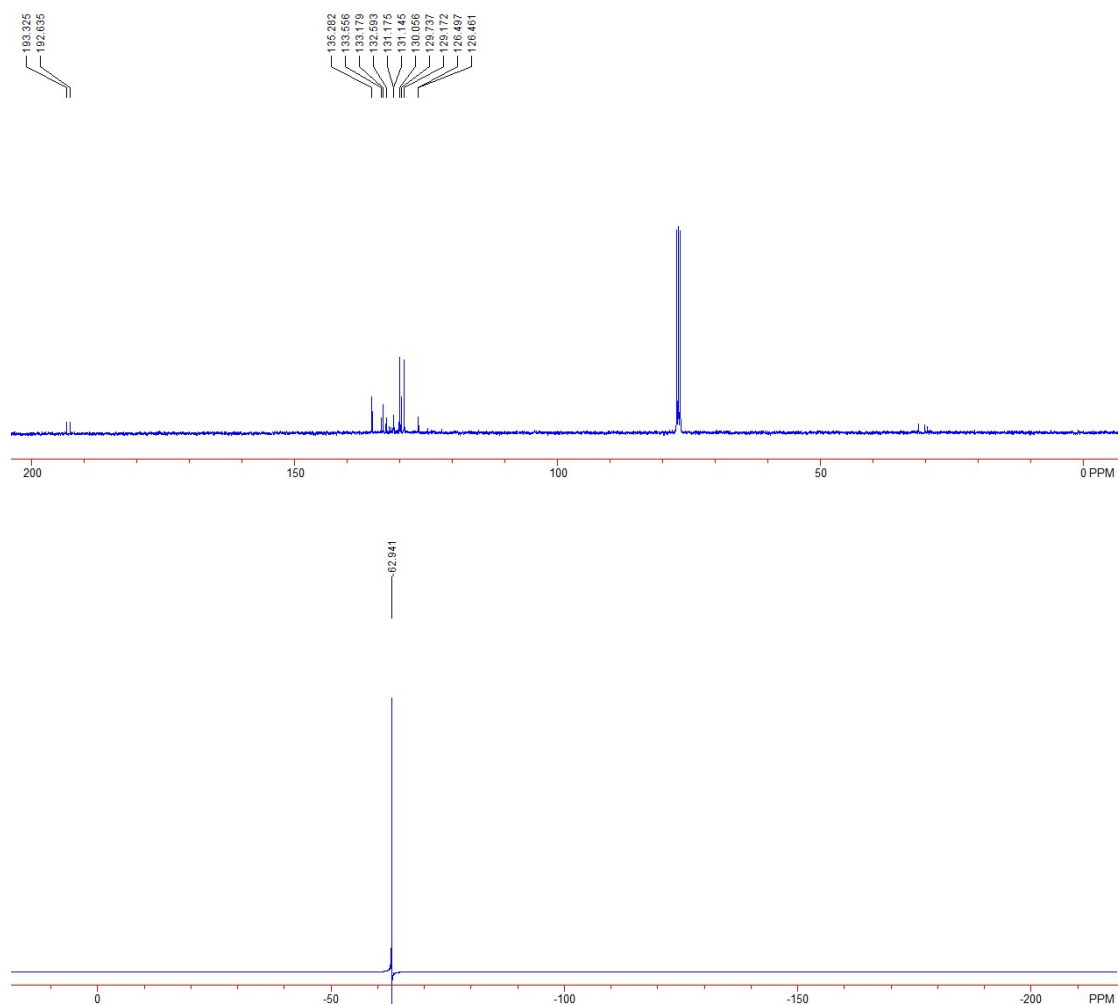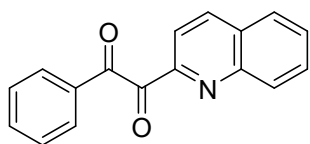

**1-Phenyl-2-(quinolin-2-yl)ethane-1,2-dione (31).** 56 mg, 43% yield; brown solid after purification by column chromatography (eluent, ethyl acetate/petroleum ether = 1:10, v/v); mp 137 – 140 °C (lit.<sup>5</sup> 140 – 143 °C); <sup>1</sup>H NMR (400 MHz, CDCl<sub>3</sub>, TMS) δ 8.34 (s, 1H), 8.25 (t, J = 7.6 Hz, 1H), 8.18 (s, 1H), 8.06 (t, J = 6.8 Hz, 4 H), 7.84 – 7.91 (m, 2H), 7.57 – 7.66 (m, 3H), 7.45 – 7.54 (m, 2H); <sup>13</sup>C NMR (100 MHz, CDCl<sub>3</sub>) δ 191.9, 191.1, 155.4, 135.1, 134.95, 134.4, 134.1, 133.6, 130.5, 131.1, 129.8, 129.7, 129.3, 129.0, 128.5, 127.2, 125.7; GC-MS (EI): m/z=261.09(M<sup>+</sup>).



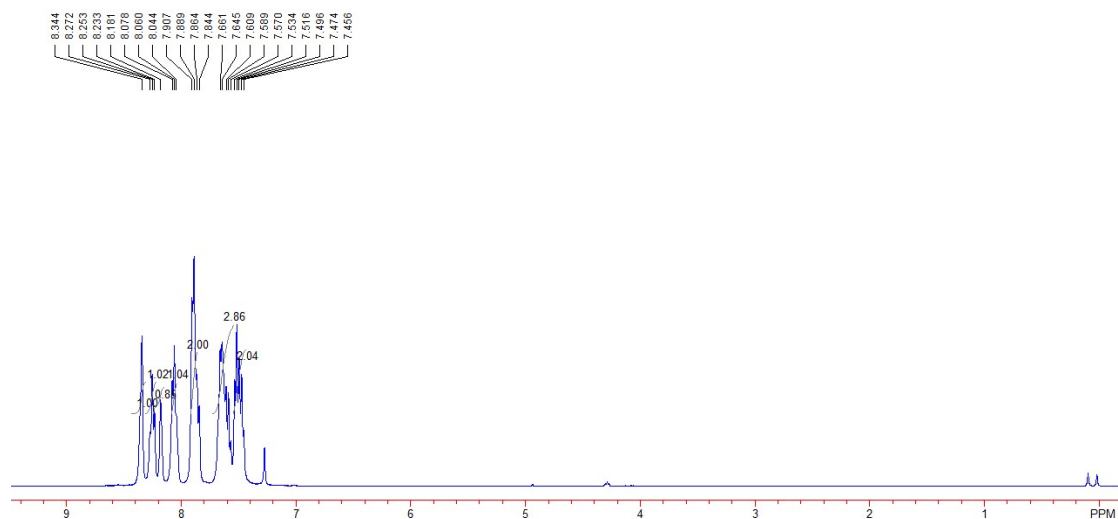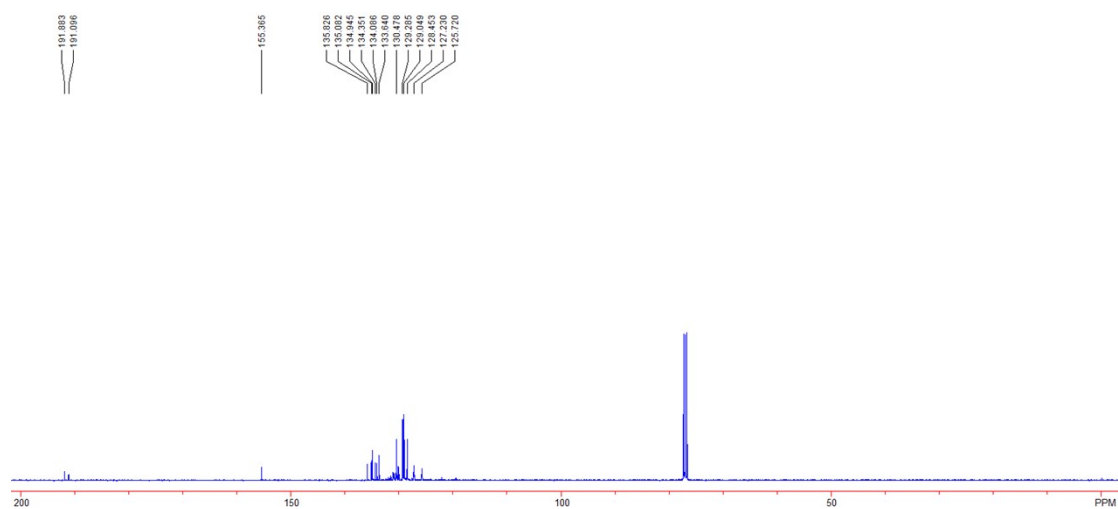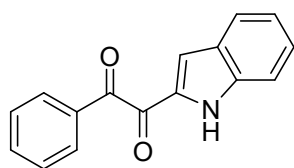

**1-(1H-indol-2-yl)-2-phenylethane-1,2-dione (3m).** 63 mg, 51% yield; light yellow solid after purification by column chromatography (eluent, ethyl acetate/petroleum ether = 1:20, v/v); mp 112 – 115 °C;  $^1\text{H NMR}$  (400 MHz,  $\text{CDCl}_3$ , TMS)  $\delta$  10.71 (s, 1H), 8.16 (d,  $J = 7.6$  Hz, 1H), 8.07 (d,  $J = 8.0$  Hz, 2H), 7.60 – 7.68 (m, 1H), 7.51 (t,  $J = 7.6$  Hz, 3H), 7.28 (s, 1H), 7.06 (s, 1H), 6.37 (t,  $J = 2.0$  Hz, 1H);  $^{13}\text{CNMR}$  (100 MHz,  $\text{CDCl}_3$ )  $\delta$  192.8, 171.2, 134.6, 133.7, 133.2, 130.2, 129.4, 129.1, 128.8, 128.7, 128.5, 122.6; GC-MS (EI):  $m/z=249.07(\text{M}^+)$ .

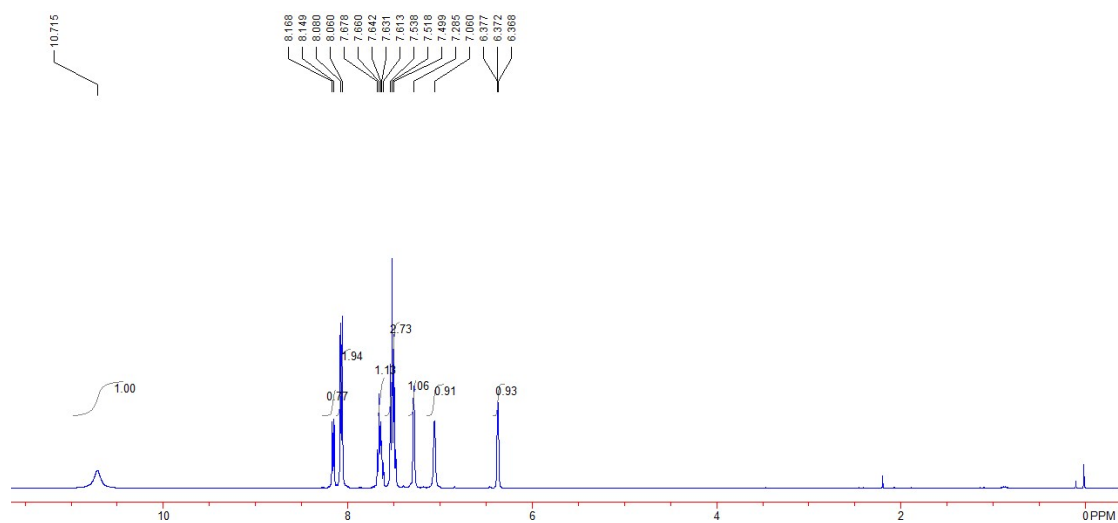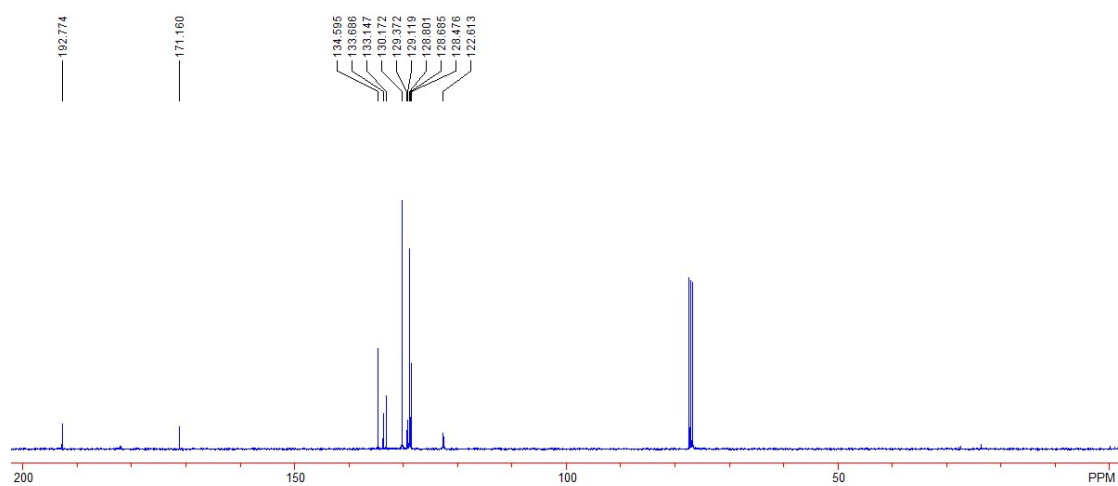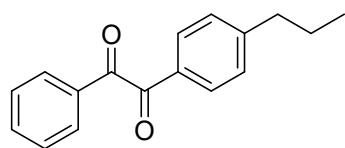

**1-phenyl-2-(4-propylphenyl)ethane-1,2-dione (3n).** 86 mg, 68% yield; light yellow solid after purification by column chromatography (eluent, ethyl acetate/petroleum ether = 1:30, v/v); mp 45 – 46 °C;  $^1\text{H}$  NMR (500 MHz,  $\text{CDCl}_3$ )  $\delta$  8.00 – 7.97 (m, 2H), 7.90 – 7.88 (m, 2H), 7.67 – 7.64 (m, 1H), 7.53 – 7.49 (m, 2H), 7.31 (d,  $J = 8.5$  Hz, 2H), 2.67 (d,  $J = 7.5$  Hz, 2H), 1.71 – 1.63 (m, 2H), 0.95 (t,  $J = 7.5$  Hz, 3H);  $^{13}\text{C}$  NMR (125 MHz,  $\text{CDCl}_3$ )  $\delta$  193.8, 192.6, 135.2, 132.7, 132.1, 131.1,

130.0, 129.1, 120.7, 31.5, 30.2, 29.7; GC-MS (EI):  $m/z=252.13(M^+)$ .

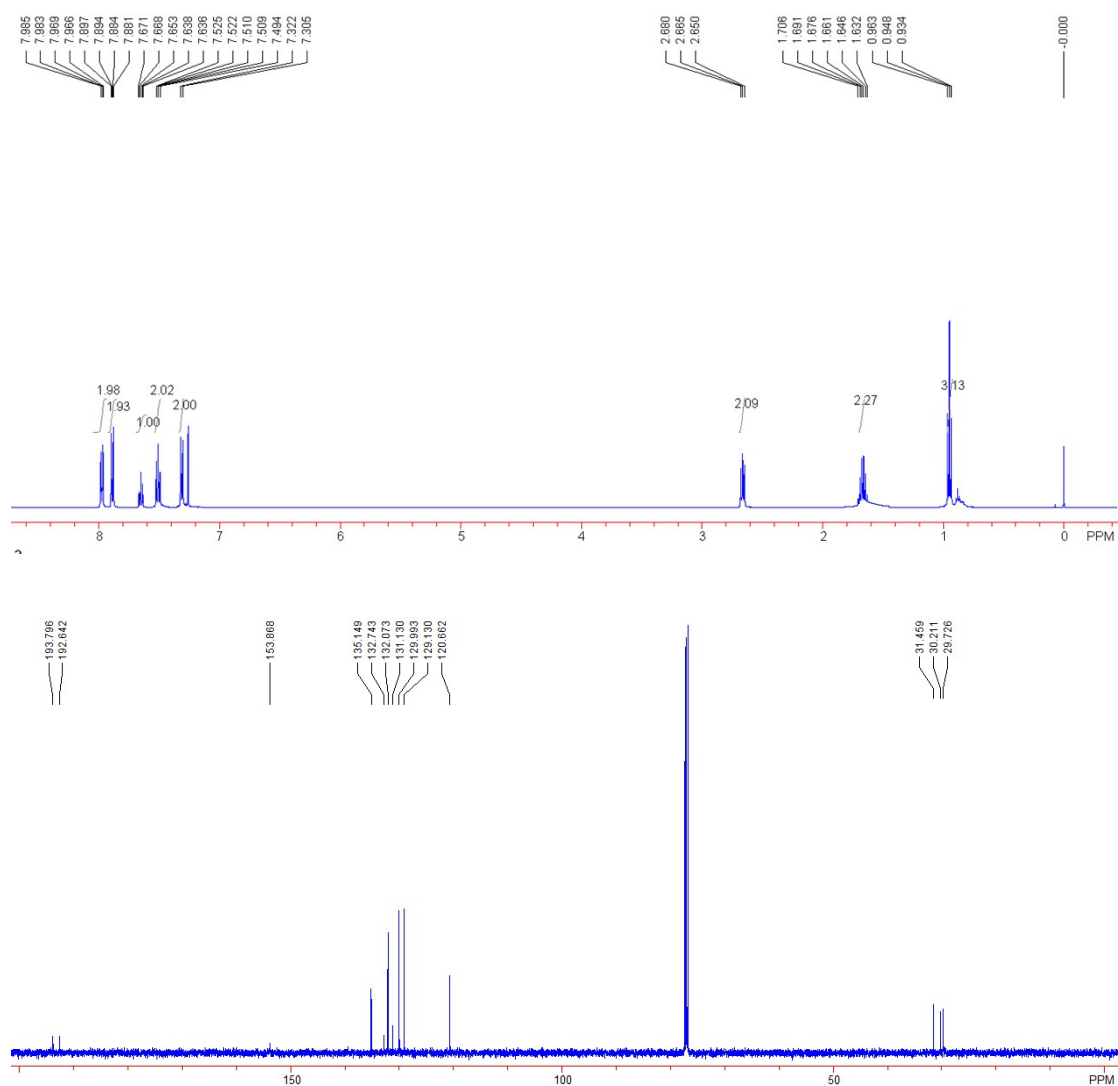

**1-(4-isopropylphenyl)-2-phenylethane-1,2-dione (30)**. 88 mg, 70% yield; light yellow solid after purification by column chromatography (eluent, ethyl acetate/petroleum ether = 1:30, v/v); mp 41 – 42 °C;  $^1\text{H}$  NMR (400 MHz,  $\text{CDCl}_3$ )  $\delta$  8.00 (dd,  $J = 8.4, 0.8$  Hz, 2H), 7.93 (d,  $J = 8.0$  Hz, 2H), 7.68 (t,  $J = 7.2$  Hz, 1H), 7.53 (t,  $J = 8.4$  Hz, 2H), 7.39 (t,  $J = 8.4$  Hz, 2H), 3.04 – 2.96 (m, 1H), 1.29 (d,  $J = 6.8$  Hz, 6H);  $^{13}\text{C}$  NMR (100 MHz,  $\text{CDCl}_3$ )  $\delta$  194.8, 194.3, 156.9, 141.6, 134.8, 133.1, 130.9,

130.2, 129.9, 129.0, 127.2, 34.5, 23.6; GC-MS (EI):  $m/z=252.10(M^+)$ .

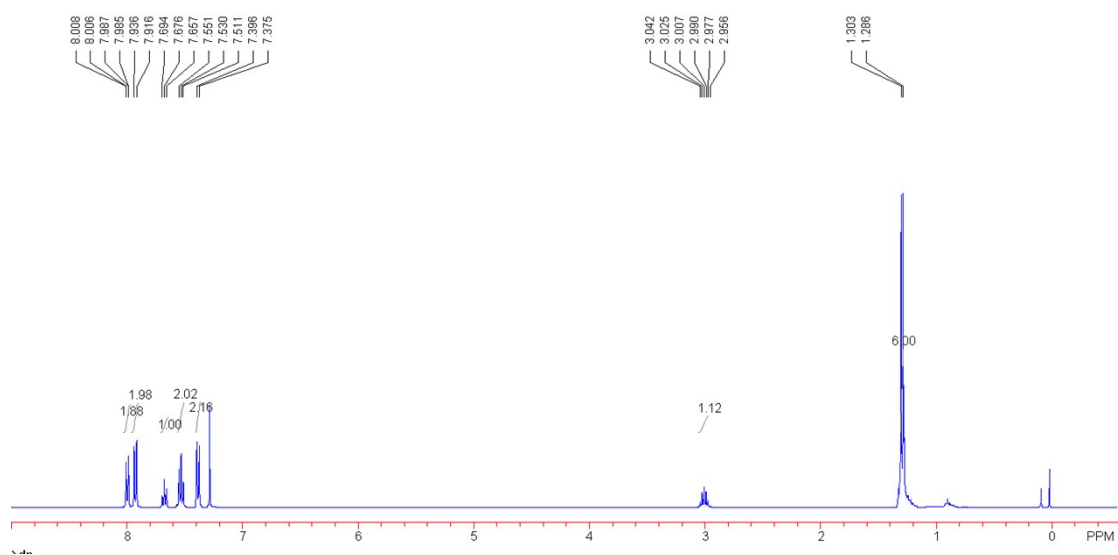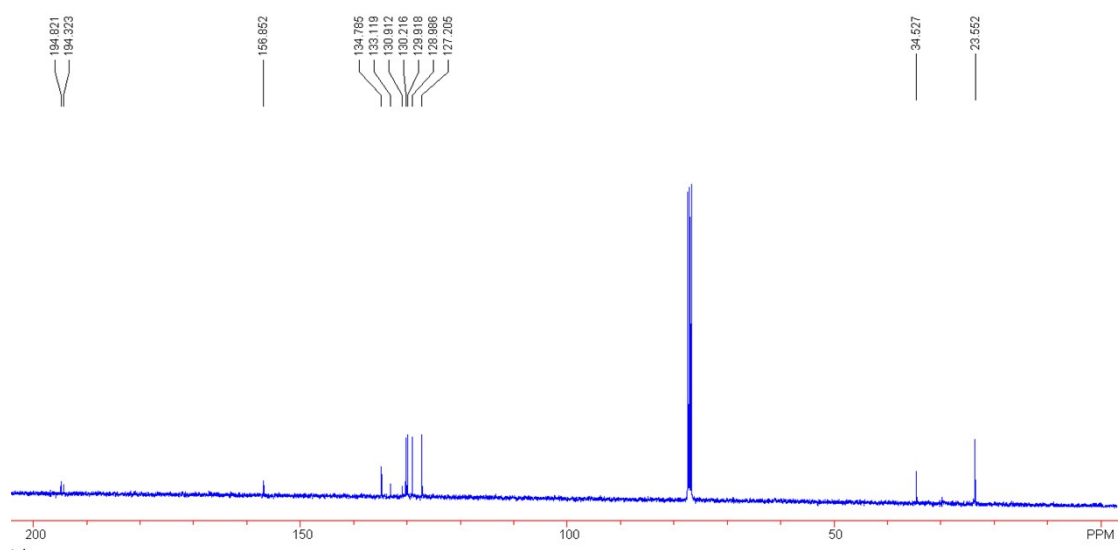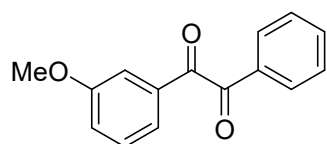

**1-(3-methoxyphenyl)-2-phenylethane-1,2-dione (3p)**. 88 mg, 73% yield; light yellow solid after purification by column chromatography (eluent, ethyl acetate/petroleum ether = 1:30, v/v); mp 93 – 94 °C (lit.<sup>6</sup> 91 – 93 °C); <sup>1</sup>H NMR (400 MHz, CDCl<sub>3</sub>) δ 7.90 (dd, *J* = 8.4, 0.8 Hz, 2H), 7.68 (t, *J* = 7.2 Hz, 1H), 7.57 – 7.49 (m, 4H), 7.42 (t, *J* = 8.0 Hz, 1H), 7.24 – 7.21 (m, 1H), 3.89 (s, 3H); <sup>13</sup>C NMR (100 MHz, CDCl<sub>3</sub>) δ 194.52, δ 194.50, 160.1, 134.9, 134.2, 133.0, 130.1, 129.9, 129.0, 123.3, 20

121.9, 112.8, 55.6; GC-MS (EI):  $m/z=240.07(M^+)$ .

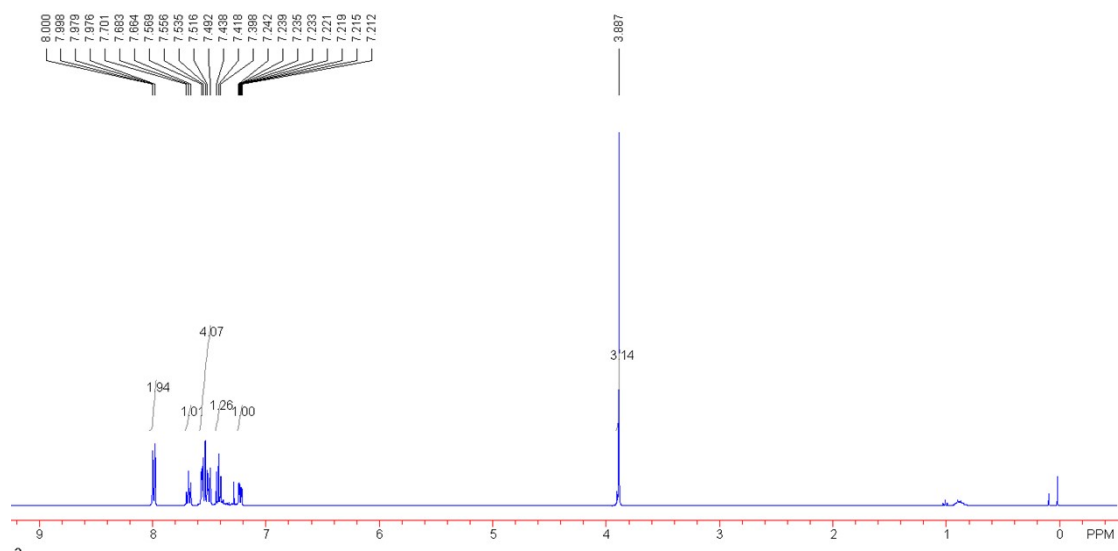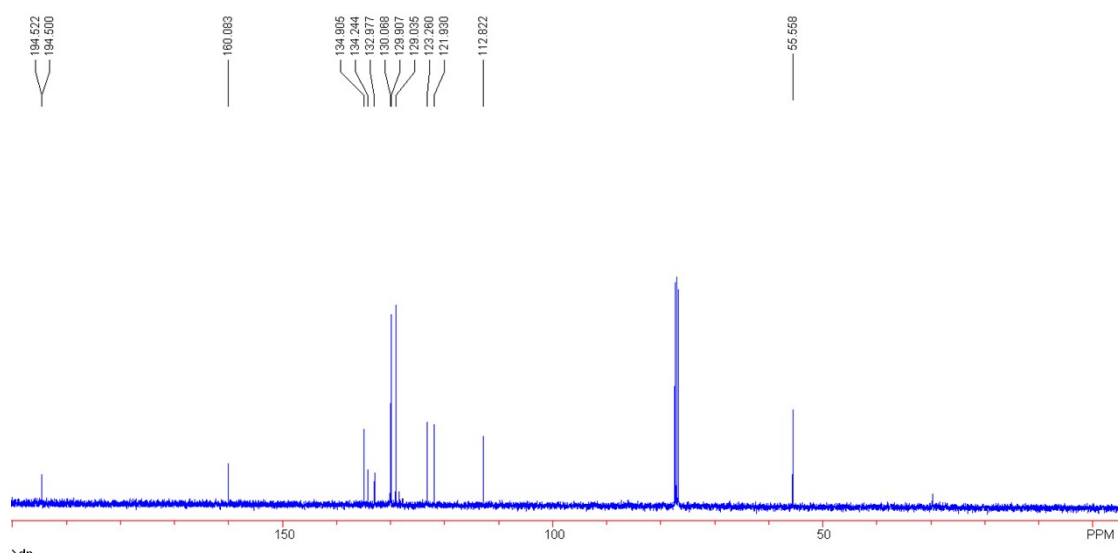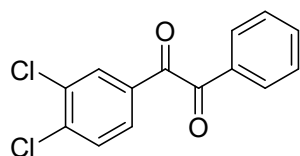

**1-(3,4-dichlorophenyl)-2-phenylethane-1,2-dione (3q).** 81 mg, 58% yield; yellow solid after purification by column chromatography (eluent, ethyl acetate/petroleum ether = 1:20, v/v); mp 61 – 62 °C;  $^1\text{H NMR}$  (500 MHz,  $\text{CDCl}_3$ )  $\delta$  8.08 (d,  $J = 2$  Hz, 1H), 7.80 (dd,  $J = 8.5, 1.5$  Hz, 2H), 7.81

(dd,  $J = 8.5, 1.5$  Hz, 1H), 7.71-7.68 (m, 1H), 7.61 (d,  $J = 8$  Hz, 1H), 7.55 – 7.52 (m, 2H);  $^{13}\text{C}$  NMR (125 MHz,  $\text{CDCl}_3$ )  $\delta$  191.8, 191.1, 150.1, 136.3, 134.5, 131.3, 129.9, 129.0, 128.2, 123.1; GC-MS (EI):  $m/z = 278.00(\text{M}^+)$ .

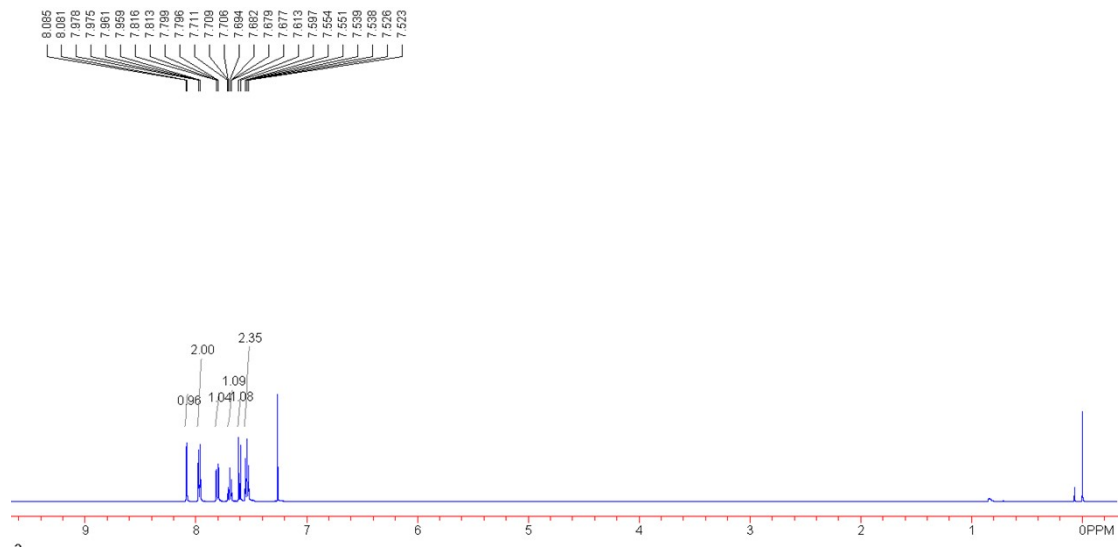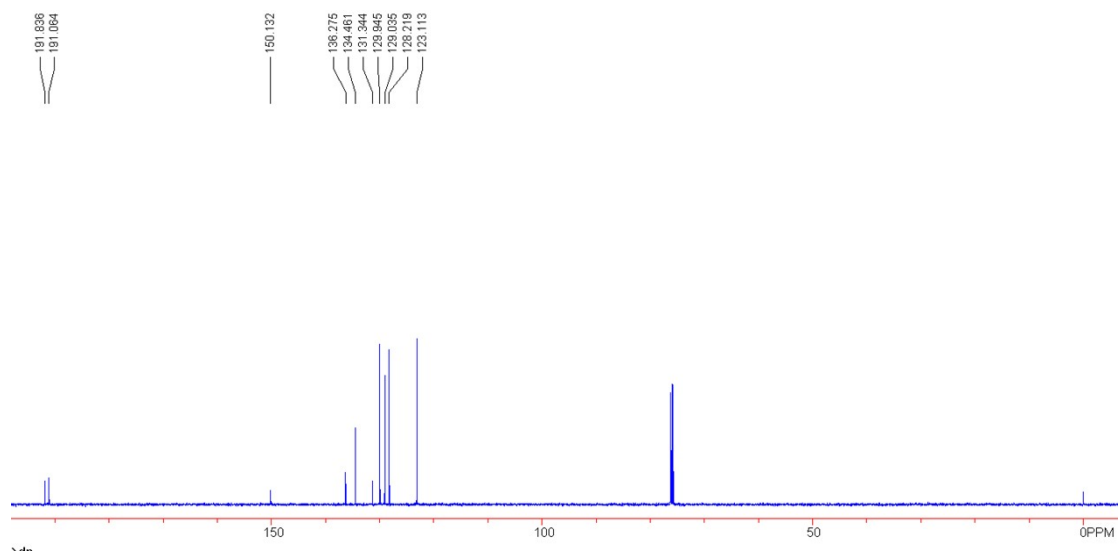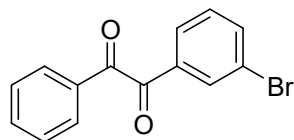

**1-(3-Bromophenyl)-2-phenylethane-1,2-dione (3r).** 101 mg, 70% yield; yellow solid after purification by column chromatography (eluent, ethyl acetate/petroleum ether = 1:20, v/v); mp 82 – 83 °C (lit.<sup>7</sup> 80 – 81 °C);  $^1\text{H}$  NMR (400 MHz,  $\text{CDCl}_3$ , TMS)  $\delta$  8.12 (s, 1H), 7.96 (d,  $J = 7.6$  Hz, 22

2H), 7.87 (d,  $J = 8.0$  Hz, 1H), 7.75 (d,  $J = 7.6$  Hz, 1H), 7.66 (t,  $J = 7.2$  Hz, 1H), 7.50 (t,  $J = 7.6$  Hz, 2H), 7.37 (t,  $J = 8.0$  Hz, 1H);  $^{13}\text{C}$  NMR (100 MHz,  $\text{CDCl}_3$ )  $\delta$  193.5, 192.8, 137.7, 135.1, 134.6, 132.6, 132.4, 130.6, 129.9, 129.1, 128.6, 123.3; GC-MS (EI):  $m/z=287.99(\text{M}^+)$ .

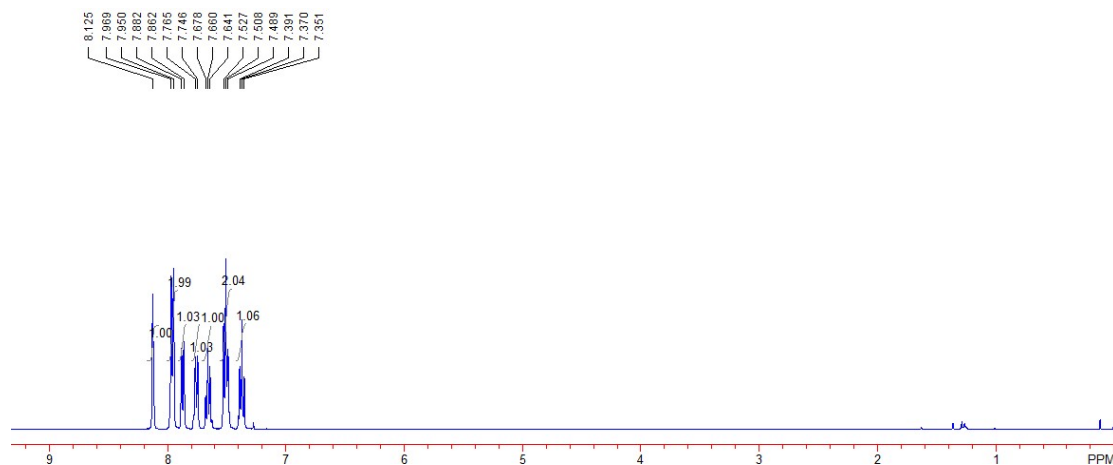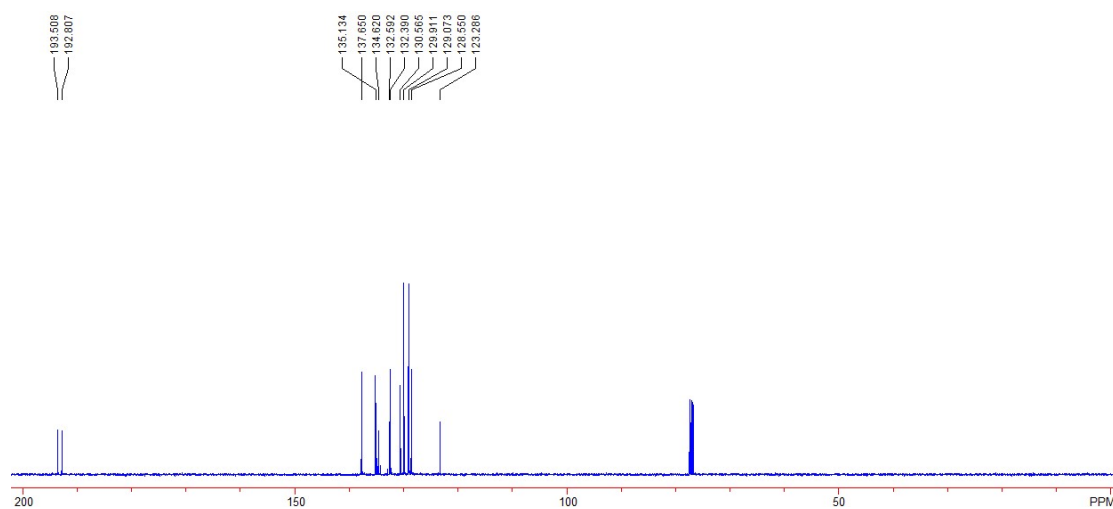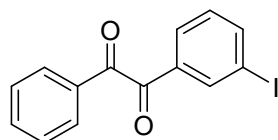

**1-(3-iodophenyl)-2-phenylethane-1,2-dione (3s).** 128 mg, 76% yield; light brown solid after purification by column chromatography (eluent, ethyl acetate/petroleum ether = 1:30, v/v); mp 117 – 119 °C;  $^1\text{H}$  NMR (400 MHz,  $\text{CDCl}_3$ , TMS)  $\delta$  8.11 (s, 1 H), 7.95 (d,  $J = 7.6$  Hz, 2 H), 7.86 (d,  $J =$

7.6 Hz, 1 H), 7.77 (t,  $J = 7.2$  Hz, 1 H), 7.67 (t,  $J = 7.6$  Hz, 1 H), 7.51 (t,  $J = 7.6$  Hz, 2 H), 7.35 – 7.41 (m, 1H);  $^{13}\text{C}$  NMR (100 MHz,  $\text{CDCl}_3$ )  $\delta$  192.8, 191.8, 137.9, 134.6, 134.3, 132.6, 132.4, 130.6, 129.8, 129.0, 128.6, 123.4; GC-MS (EI):  $m/z=335.94(\text{M}^+)$ .

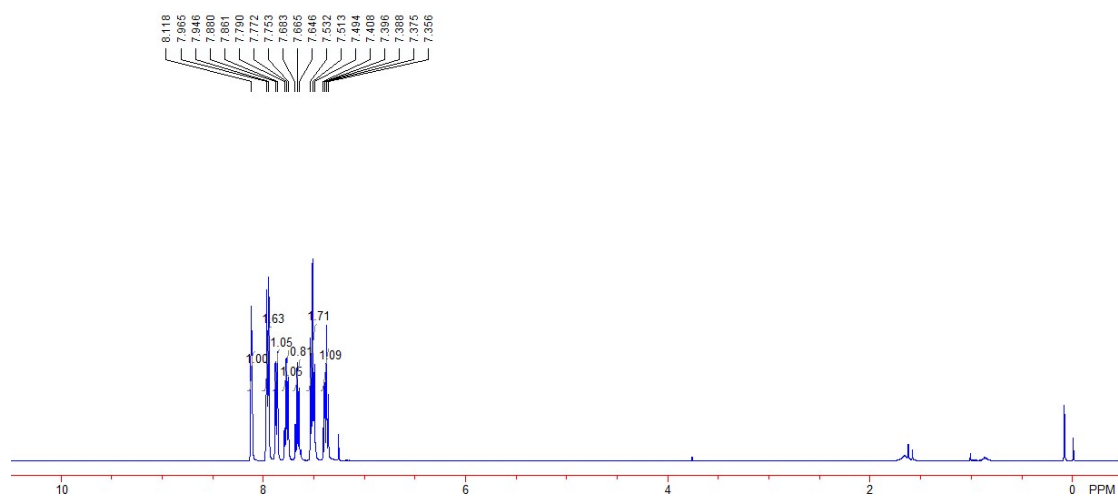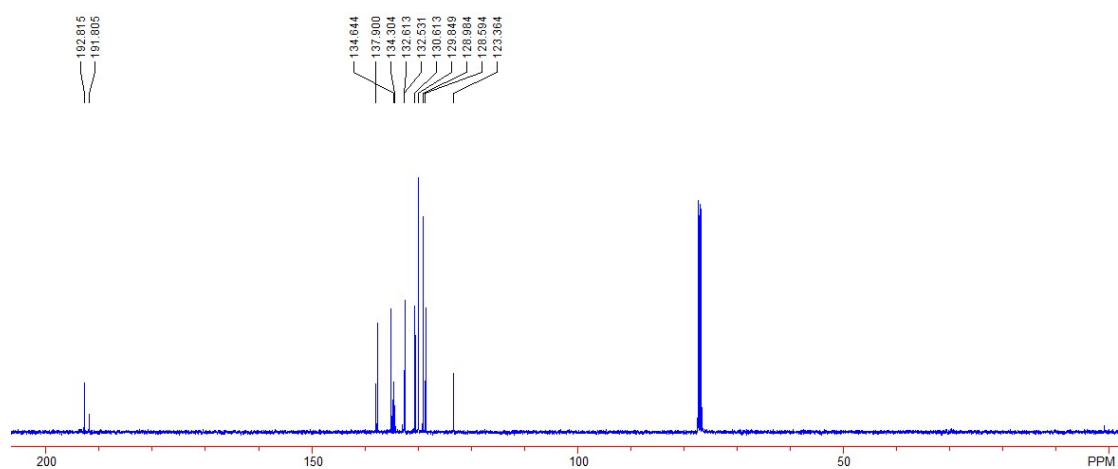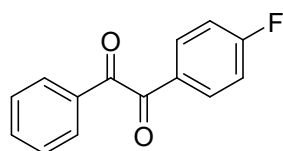

**1-(4-Fluorophenyl)-2-phenylethane-1,2-dione (3t).** 74 mg, 65% yield; light yellow solid after purification by column chromatography (eluent, ethyl acetate/petroleum ether = 1:20, v/v); mp 63 – 65 °C (lit.<sup>8</sup> 62 – 63.5 °C);  $^1\text{H}$  NMR (400 MHz,  $\text{CDCl}_3$ , TMS)  $\delta$  8.00 – 8.04 (m, 2 H), 7.97 (d,  $J =$



7.6 Hz, 2 H), 7.67 (t,  $J = 7.6$  Hz, 1 H), 7.52 (t,  $J = 7.6$  Hz, 2 H), 7.19 (t,  $J = 8.4$  Hz, 2 H);  $^{13}\text{C}$  NMR (100 MHz,  $\text{CDCl}_3$ )  $\delta$  194.1, 192.7, 166.7 ( $J = 272.3$  Hz), 135.0, 132.8 (t,  $J = 3.8$  Hz), 132.7, 129.9, 129.0, 116.5, 116.3.  $^{19}\text{F}$  NMR (250 MHz,  $\text{CDCl}_3$ )  $\delta$  -101.19; GC-MS (EI):  $m/z=228.05(\text{M}^+)$ .

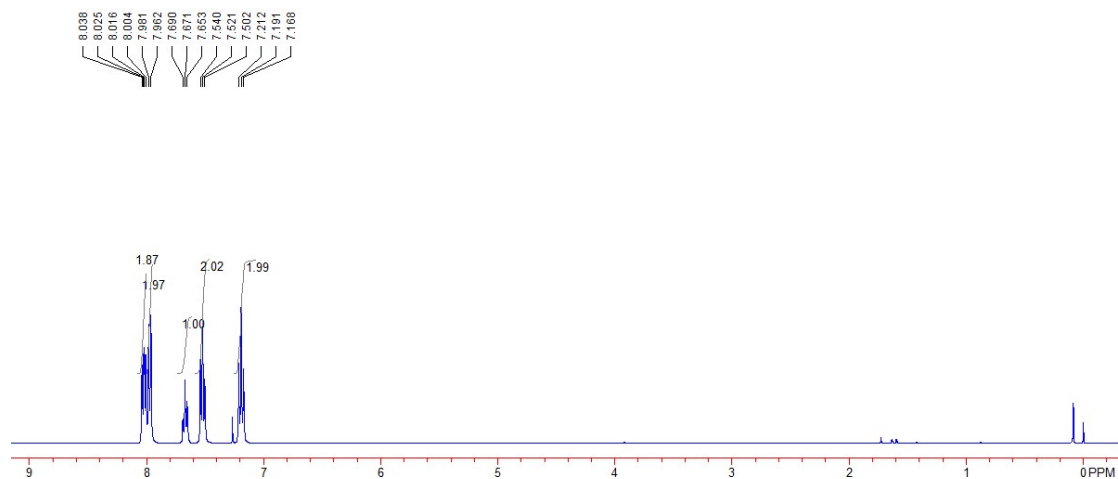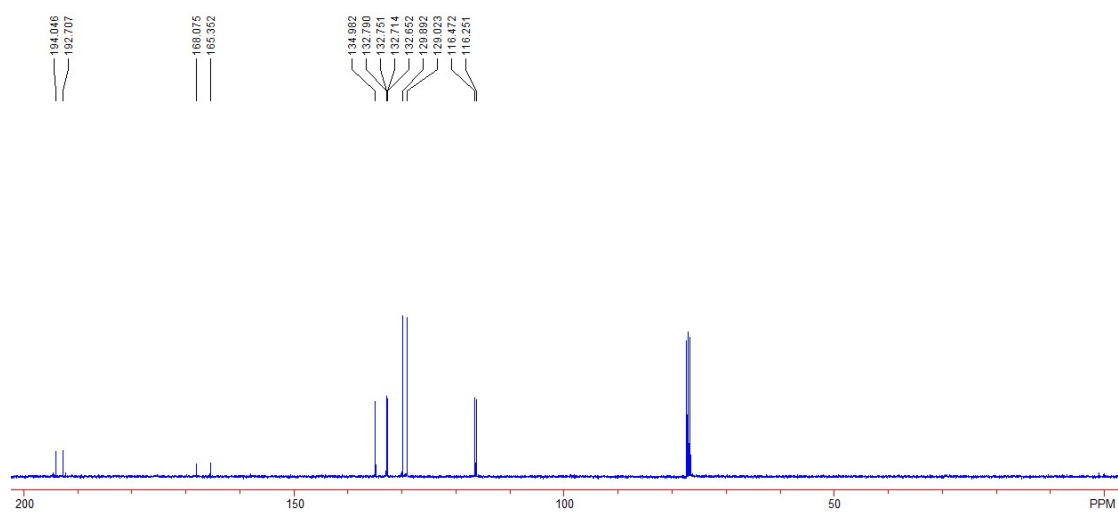

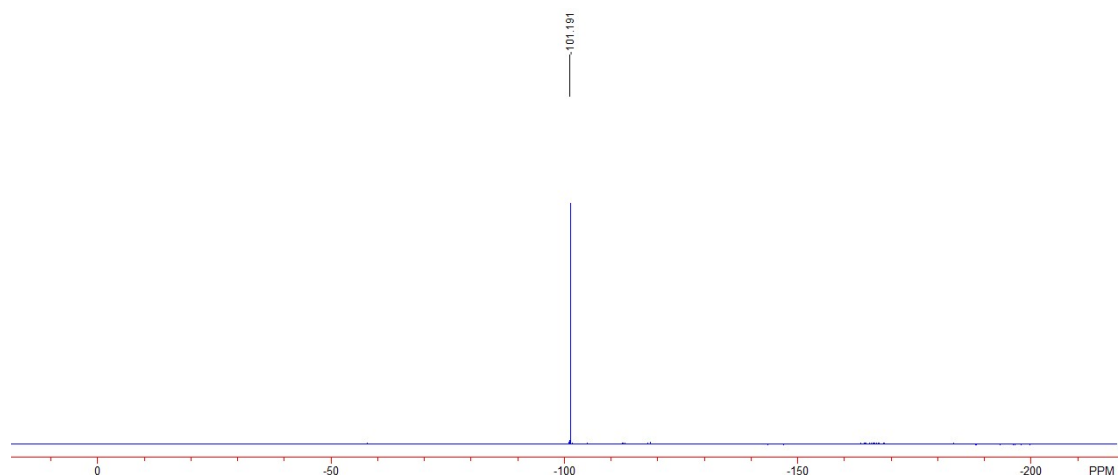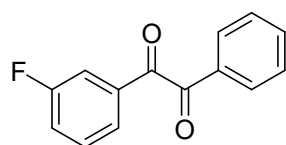

**1-(3-fluorophenyl)-2-phenylethane-1,2-dione (3u).** 79 mg, 69% yield; light yellow solid after purification by column chromatography (eluent, ethyl acetate/petroleum ether = 1:30, v/v); mp 52 – 54 °C;  $^1\text{H}$  NMR (400 MHz,  $\text{CDCl}_3$ )  $\delta$  8.00 (d,  $J = 7.6$  Hz, 1H), 7.77 – 7.68 (m, 3H), 7.57 – 7.49 (m, 3H), 7.40 – 7.36 (m, 1H);  $^{13}\text{C}$  NMR (100 MHz,  $\text{CDCl}_3$ )  $\delta$  193.7, 193.0, 162.9 (d,  $J = 248$  Hz), 135.0 (t,  $J = 6.6$  Hz), 132.7 (d,  $J = 6.7$  Hz), 132.7, 130.8 (d,  $J = 6.8$  Hz), 130.0, 129.1, 126.0 (d,  $J = 1.9$  Hz), 122.0 (d,  $J = 21.3$  Hz), 116.1 (d,  $J = 22.7$  Hz);  $^{19}\text{F}$  NMR (250 MHz,  $\text{CDCl}_3$ )  $\delta$  -110.56; GC-MS (EI):  $m/z=228.07(\text{M}^+)$ .

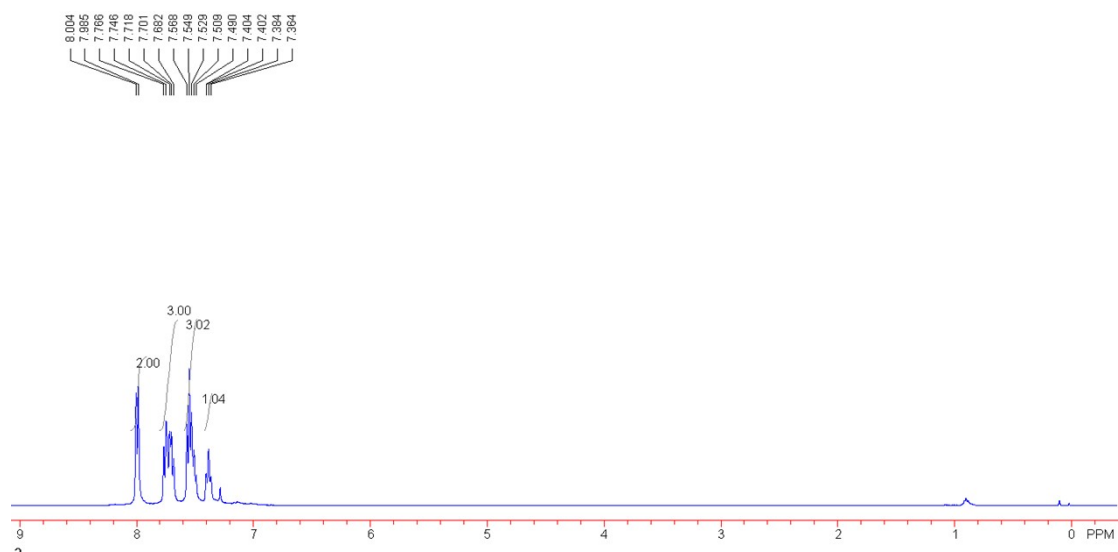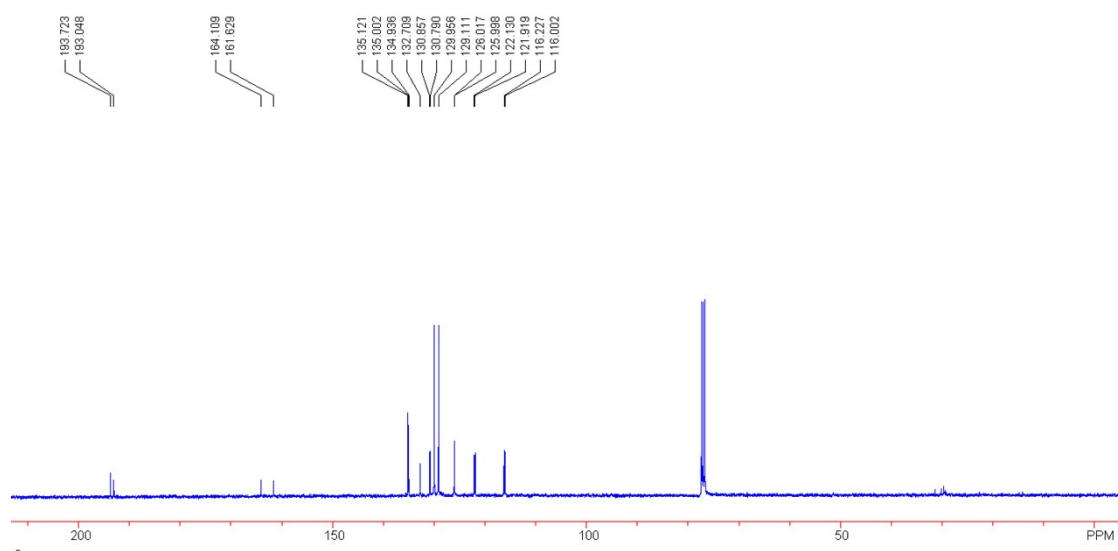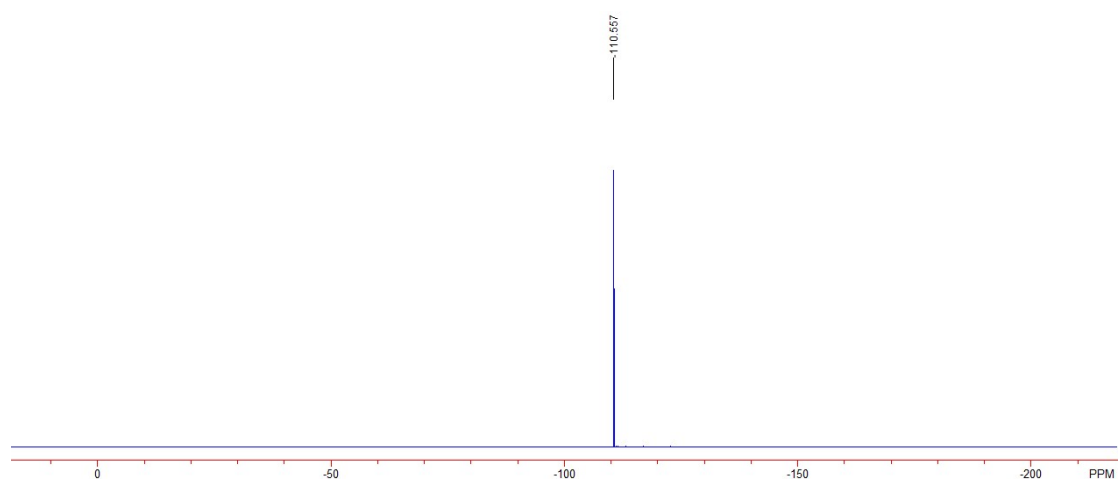

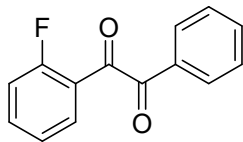

**1-(2-fluorophenyl)-2-phenylethane-1,2-dione (3v).** 68 mg, 60% yield; white solid after purification by column chromatography (eluent, ethyl acetate/petroleum ether = 1:30, v/v); mp 55 – 57 °C (lit.<sup>9</sup> 58 – 60 °C); <sup>1</sup>H NMR (500 MHz, CDCl<sub>3</sub>, TMS) δ 8.06 (td, *J* = 7.5, 1.5 Hz, 1H), 7.99 – 7.97 (m, 2H), 7.69 – 7.63 (m, 2H), 7.55 – 7.52 (m, 2H), 7.3 – 7.34 (m, 1H), 7.15 – 7.11 (m, 1H); <sup>13</sup>C NMR (125 MHz, CDCl<sub>3</sub>) δ 194.8, 194.4, 150.9, 134.8, 133.1, 130.8, 130.1, 129.9, 129.2, 129.0; <sup>19</sup>F NMR (250 MHz, CDCl<sub>3</sub>) δ –107.24; GC-MS (EI): *m/z*=228.04(M<sup>+</sup>).

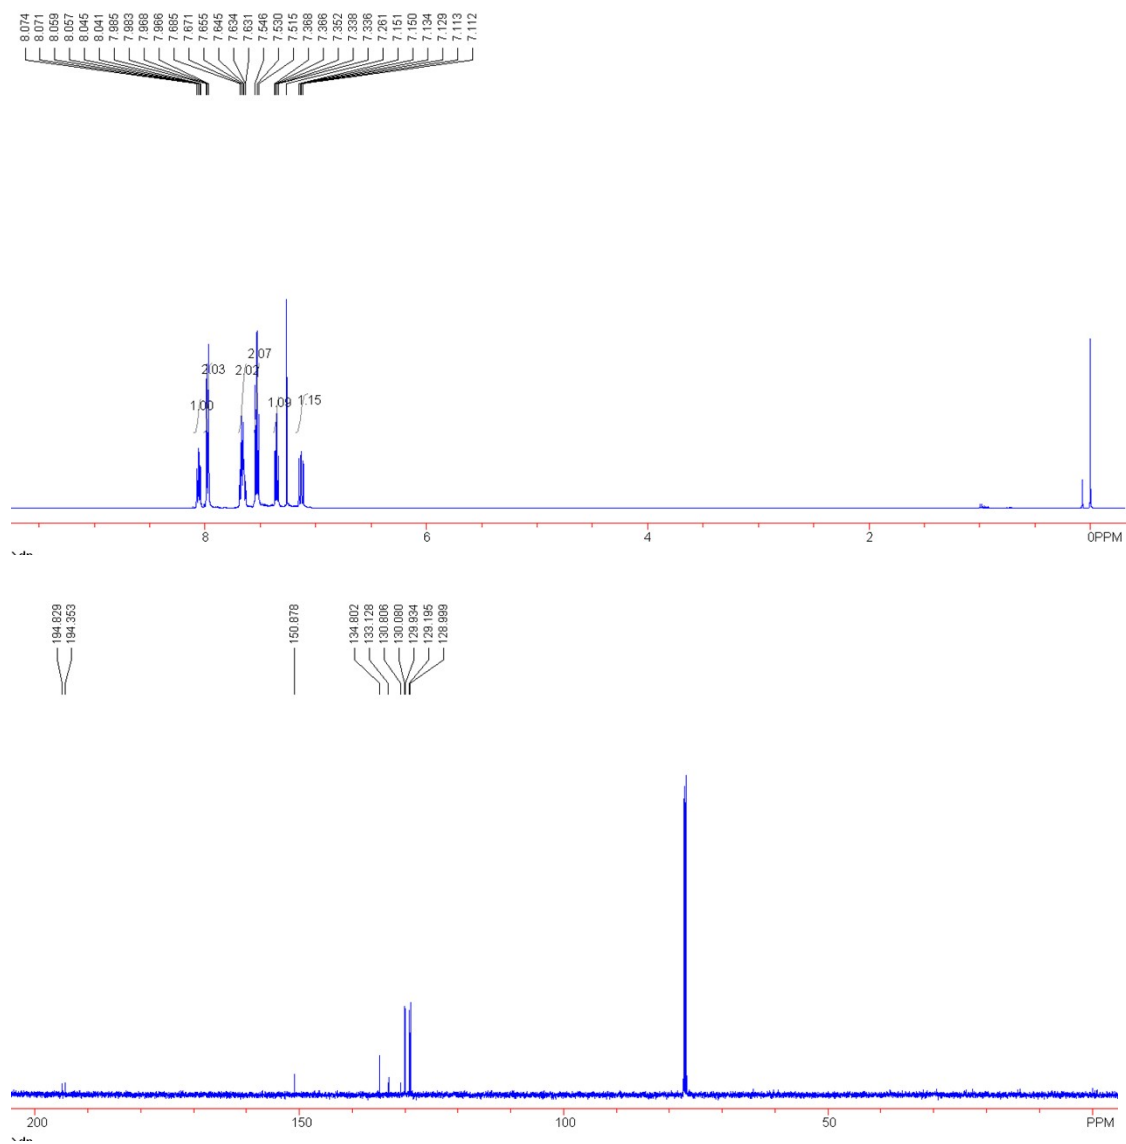

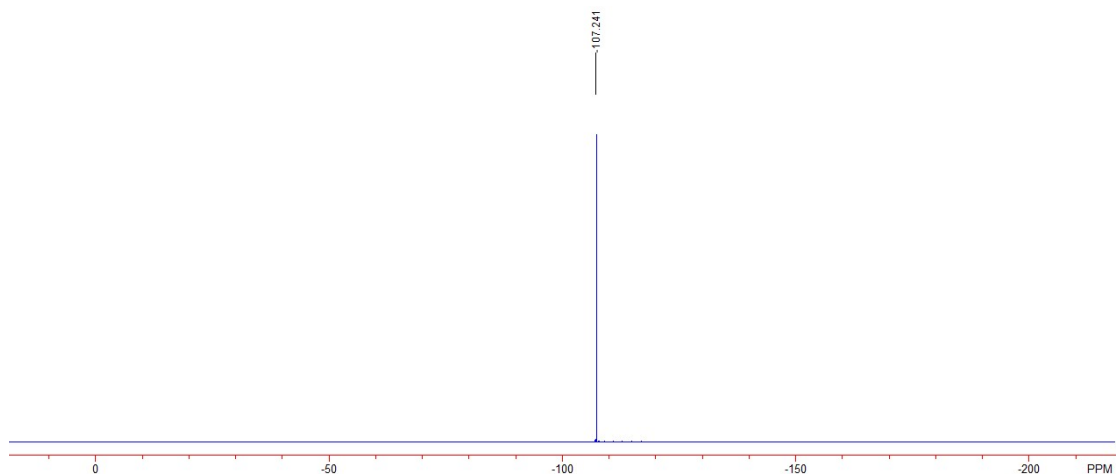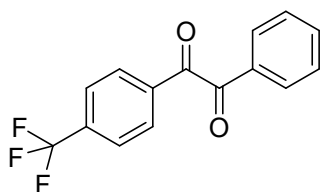

**1-phenyl-2-(4-(trifluoromethyl)phenyl)ethane-1,2-dione (3w).** 72 mg, 52% yield; yellow solid after purification by column chromatography (eluent, ethyl acetate/petroleum ether = 1:30, v/v); mp 84 – 86 °C;  $^1\text{H}$  NMR (500 MHz,  $\text{CDCl}_3$ )  $\delta$  8.05 (d,  $J = 9.0$  Hz, 2H), 7.98 (m, 2H), 7.68 (t,  $J = 7.5$  Hz, 1H), 7.53 (t,  $J = 8.0$  Hz, 2H), 7.34 (t,  $J = 8.0$  Hz, 2H);  $^{13}\text{C}$  NMR (125 MHz,  $\text{CDCl}_3$ )  $\delta$  193.1 , 191.8, 135.6 ( $J = 32.8$  Hz), 135.3, 134.0, 132.5, 131.5, 131.2, 130.0, 125.8 ( $J = 3.6$  Hz), 122.9 ( $J = 272.8$  Hz);  $^{19}\text{F}$  NMR (250 MHz,  $\text{CDCl}_3$ )  $\delta$  -57.54; GC-MS (EI):  $m/z=278.05(\text{M}^+)$ .

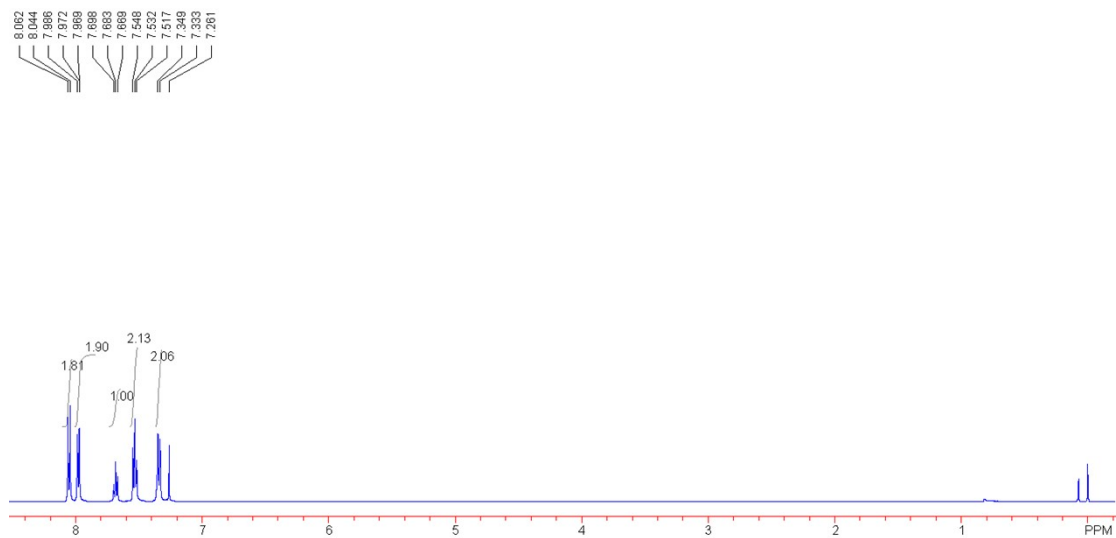

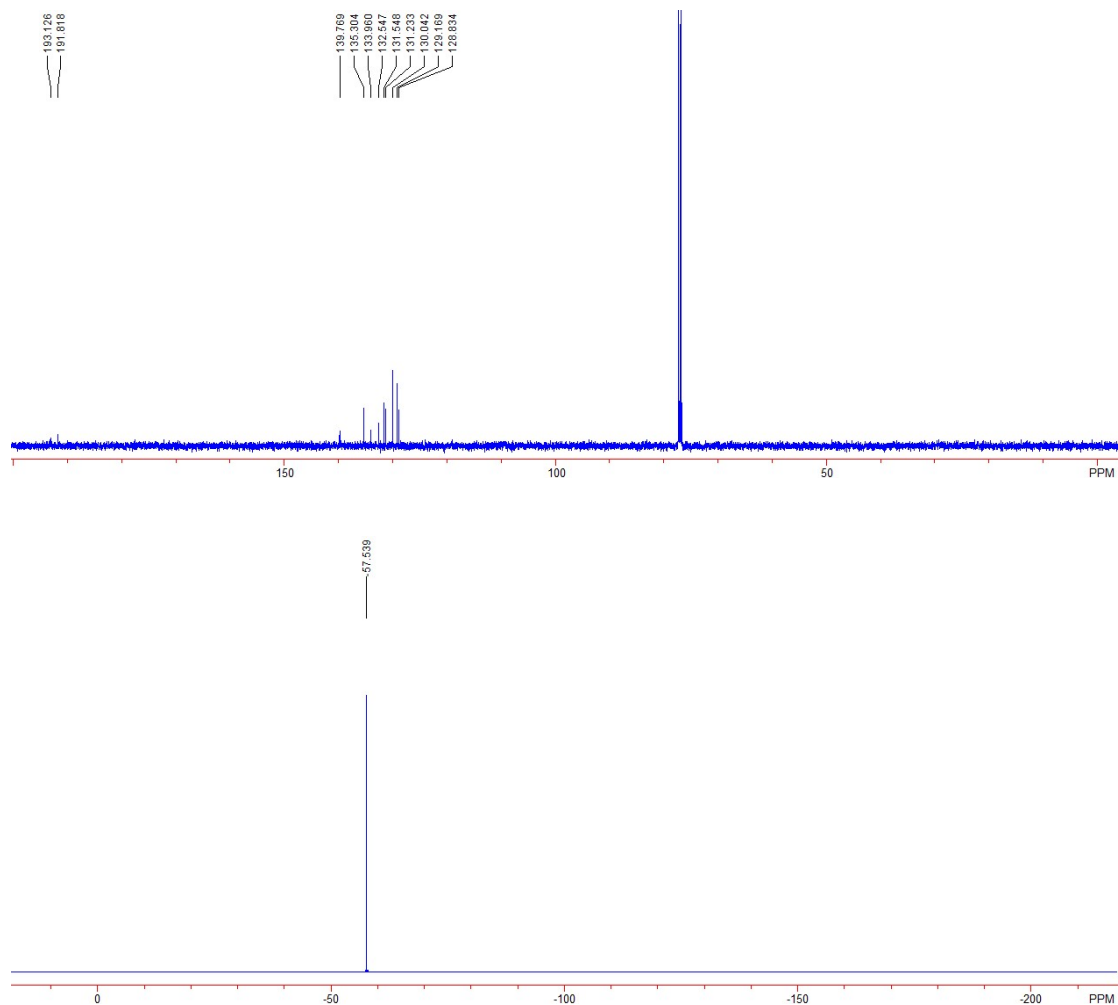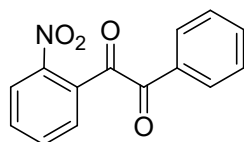

**1-(2-nitrophenyl)-2-phenylethane-1,2-dione (3x).** 64 mg, 50% yield; yellow solid after purification by column chromatography (eluent, ethyl acetate/petroleum ether = 1:30, v/v); mp 125 – 126 °C (lit.<sup>9</sup> 124 – 126 °C); <sup>1</sup>H NMR (500 MHz, CDCl<sub>3</sub>, TMS) δ 8.37 (d, *J* = 1.0 Hz, 2H), 8.19 (d, *J* = 11.5 Hz, 2H), 8.4 (dd, *J* = 10.0 Hz, *J* = 1.5 Hz, 2H), 7.75-7.71 (m, 1H), 7.57 (t, *J* = 10.0 Hz, 2H); <sup>13</sup>C NMR (125 MHz, CDCl<sub>3</sub>) δ 193.1, 191.9, 163.9, 136.9, 136.8, 134.7, 130.8, 129.9, 129.0, 125.0 (s), 116.8, 116.6; GC-MS (EI): *m/z*=255.06(M<sup>+</sup>).

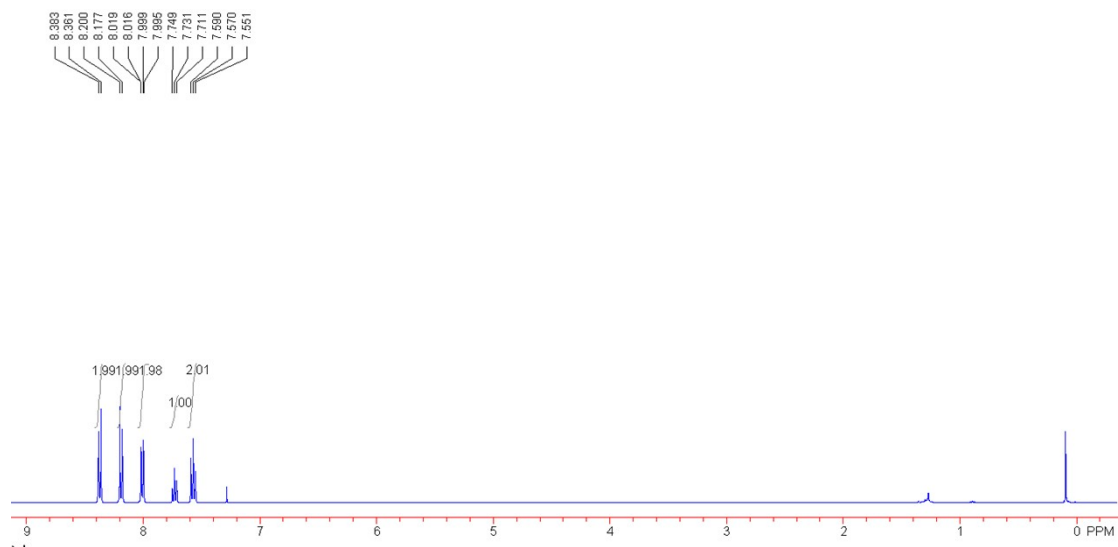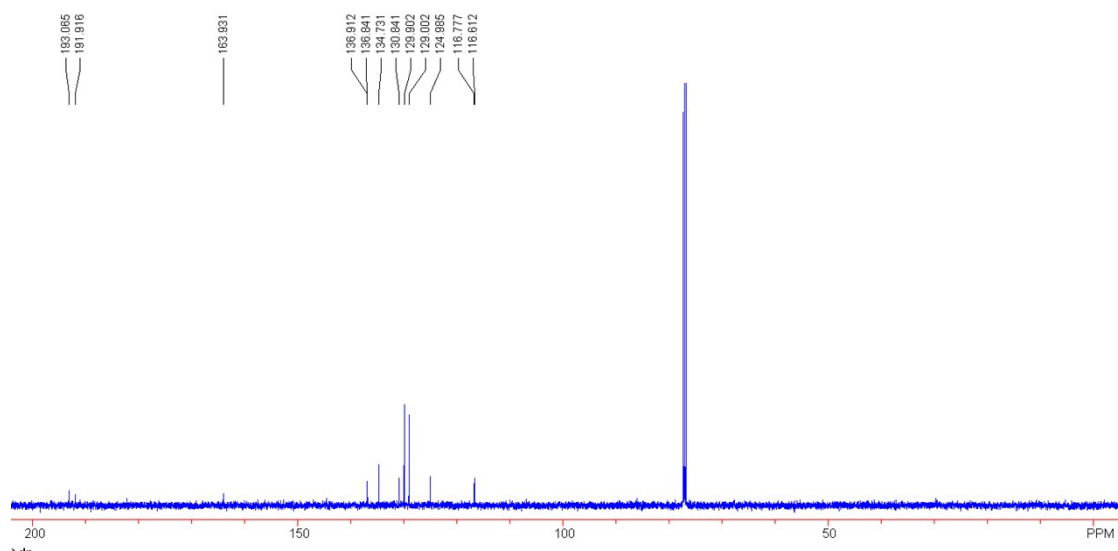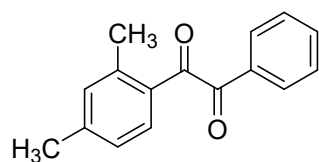

**1-(2,4-dimethylphenyl)-2-phenylethane-1,2-dione (3y).** 64 mg, 54% yield; light yellow solid after purification by column chromatography (eluent, ethyl acetate/petroleum ether = 1:30, v/v); mp 34 – 36 °C; <sup>1</sup>H NMR (400 MHz, CDCl<sub>3</sub>) δ 7.99 – 7.97 (m, 2H), 7.67 (t, *J* = 7.2 Hz, 1H), 7.57 – 7.51 (m, 2H), 7.18 (s, 1H), 7.09 (d, *J* = 8.0 Hz, 1H), 2.71 (s, 3H), 2.40 (s, 3H); <sup>13</sup>C NMR (100 MHz, CDCl<sub>3</sub>) δ 196.5, 195.1, 145.0, 141.6, 134.6, 133.5, 133.5, 133.3, 129.9, 129.2, 129.0, 126.7, 22.0, 31

21.7; GC-MS (EI):  $m/z=238.11(M^+)$ .

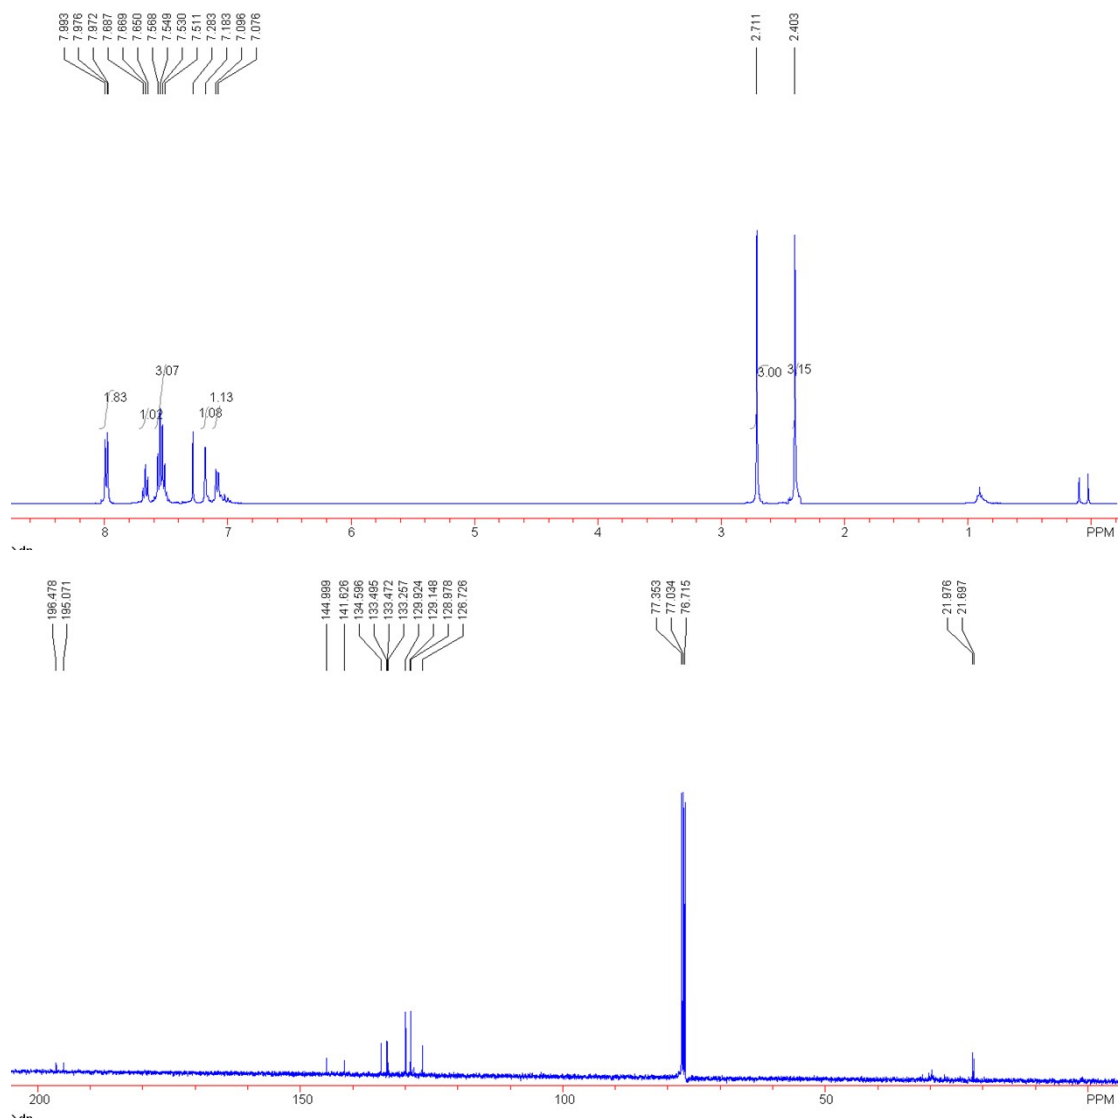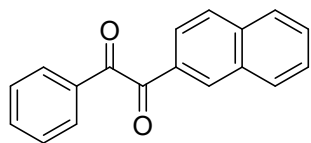

**1-(Naphthalen-2-yl)-2-phenylethane-1,2-dione (3z).** 87 mg, 67% yield; white solid after purification by column chromatography (eluent, ethyl acetate/petroleum ether = 1:10, v/v); mp 85 – 97 °C (lit.<sup>2</sup> 85 – 86 °C);  $^1H$  NMR (400 MHz,  $CDCl_3$ , TMS)  $\delta$  8.44 (s, 1H), 8.12 (d,  $J = 9.6$  Hz, 1H), 8.06 (d,  $J = 8.0$  Hz, 2H), 7.98 (t,  $J = 8.8$  Hz, 1H), 7.90 (t,  $J = 6.8$  Hz, 2H), 7.63 – 7.69 (m, 2H), 7.51 – 7.58 (m, 3H);  $^{13}C$  NMR (100 MHz,  $CDCl_3$ )  $\delta$  194.7, 136.4, 134.9, 133.5, 133.1, 132.3, 130.3, 130.0, 129.9, 129.6, 129.2, 129.0, 128.0, 127.2, 123.6; GC-MS (EI):  $m/z=260.10(M^+)$ .



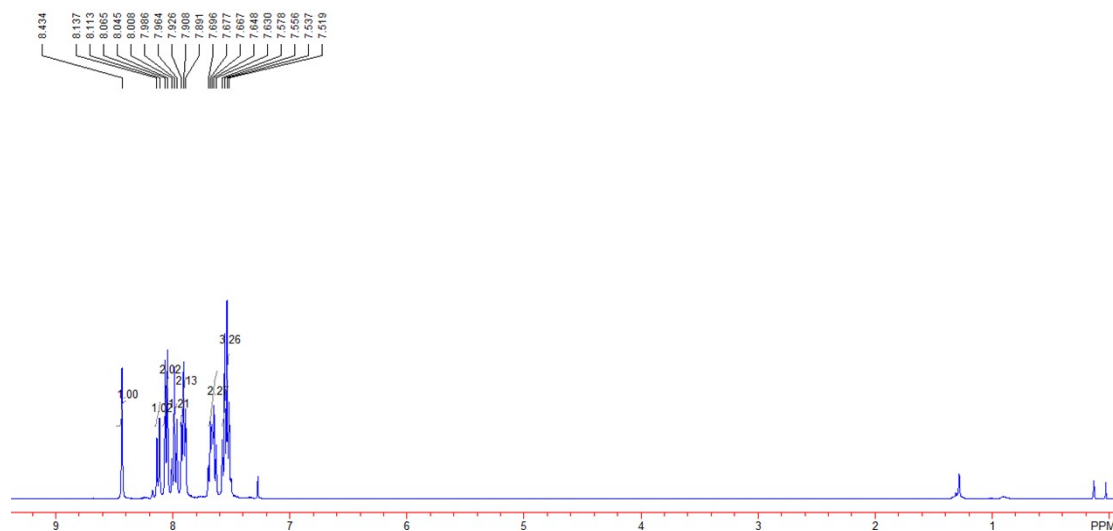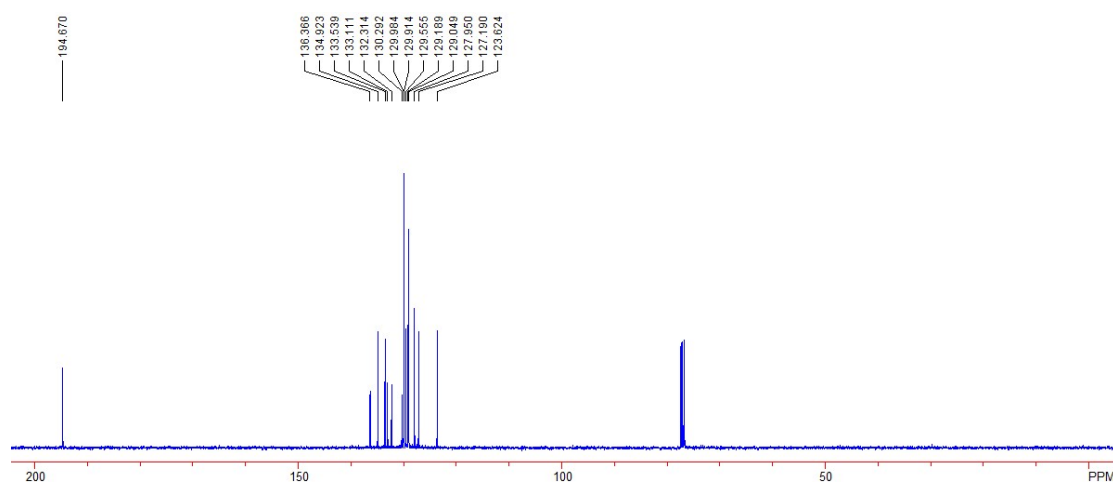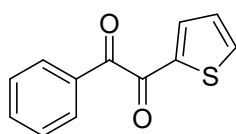

**1-Phenyl-2-(thiophen-2-yl)ethane-1,2-dione (3aa).** 47 mg, 44% yield; light yellow solid after purification by column chromatography (eluent, ethyl acetate/petroleum ether = 1:10, v/v); mp 65 – 66 °C (lit.<sup>10</sup> 63 – 65 °C); <sup>1</sup>H NMR (400 MHz, CDCl<sub>3</sub>, TMS) δ 8.02 (d, *J* = 7.2 Hz, 2H), 7.82 (d, *J* = 4.4 Hz, 1H), 7.78 (d, *J* = 3.6 Hz, 1H), 7.64 (t, *J* = 7.6 Hz, 1H), 7.49 (t, *J* = 8.0 Hz, 2H), 7.16 (t, *J* = 4.4 Hz, 1H); <sup>13</sup>CNMR(100 MHz, CDCl<sub>3</sub>) δ 198.1, 191.5, 143.1, 134.3, 133.2, 131.7, 130.3, 128.7,

128.6, 128.0, 127.6, 126.9; GC-MS (EI):  $m/z=216.01(M^+)$ .

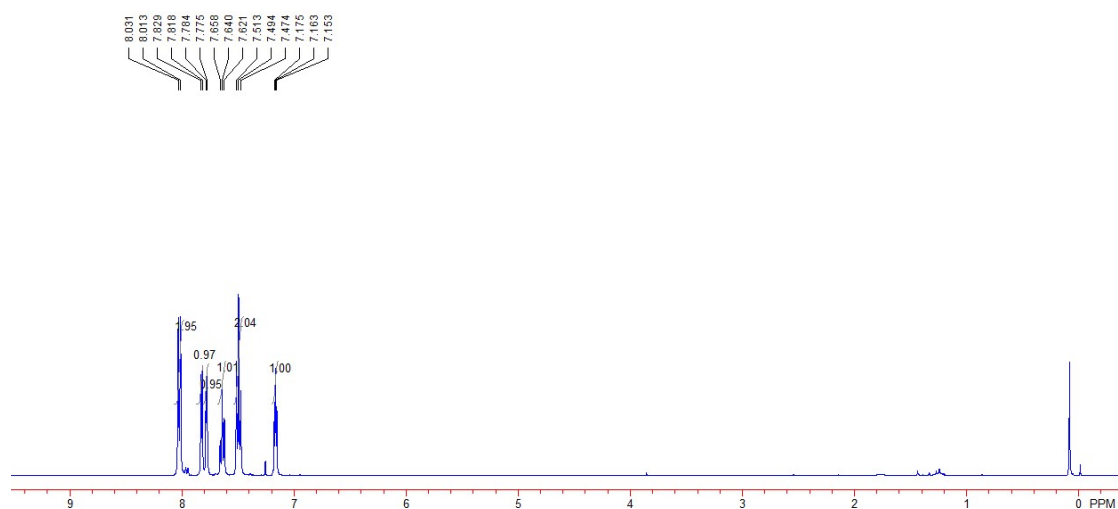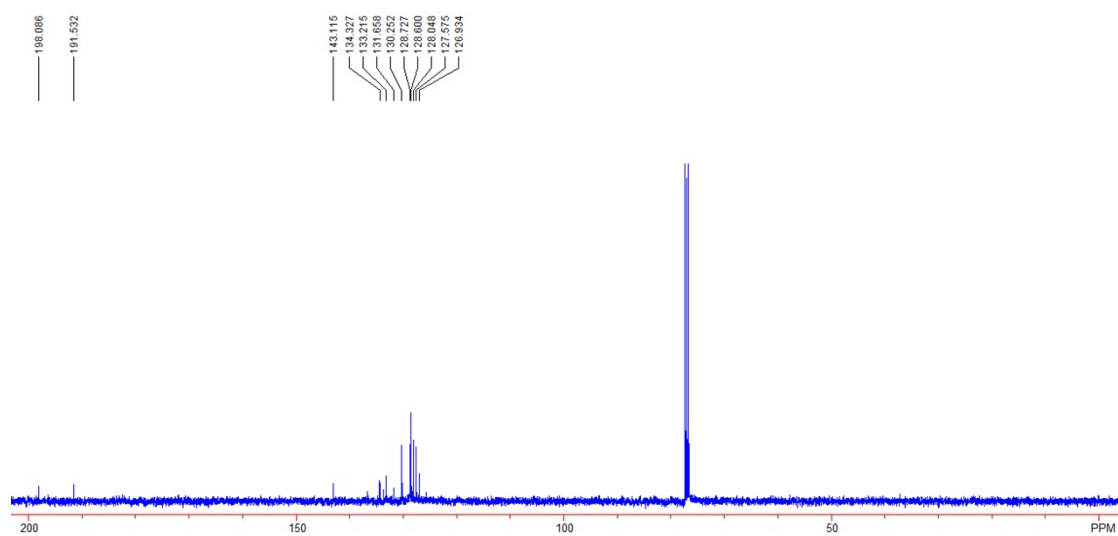

## Reference

1. Liu, Y.; Xu, X.; Zhang, Y. *Tetrahedron* **2004**, *60*(22), 4867-4873.
2. Kim, K. H.; Park, B. R.; Lim, J. W.; Kim, J. N. *Tetrahedron Letters* **2011**, *52*(27), 3463-3466.
- 3 Ren, W.; Liu, J.; Chen, L.; Wan, X. *Advanced Synthesis & Catalysis* **2010**, *352*(9), 1424-1428.
4. Suzuki, Y.; Abu Bakar, M.; Tanoi, T.; Nomura, N.; Sato, M. *Tetrahedron* **2011**, *67*(25), 4710-

4715.

5. Mehrabi, H.; *Ultrasonics Sonochemistry* **2012**, *19(1)*, 125-129.
6. Nowak, P.; Malwitz, D.; Cole, D. C. *Synthetic Communications* **2010**, *40(14)*, 2164-2171.
7. Hedberg, F. L.; Bush, D. L.; Kane, J. J.; Unroe, M. R. *Polymer Preprints (American Chemical Society, Division of Polymer Chemistry)*, **1980**, *21(2)*, 170-171.
8. Baek, J.-B.; Harris, F. W. *Journal of Polymer Science, Part A: Polymer Chemistry* **2005**, *43(4)*, 801-814.
9. Chu, Jean-Ho; Chen, Yen-Ju; Wu, Ming-Jung *Synthesis*, **2009**, *(13)*, 2155-2162.
10. Chen, C.-T.; Kao, J.-Q.; Salunke, S. B.; Lin, Y.-H. *Organic Letters* **2011**, *13(1)*, 26-29.
